# Supplementary material for: Stabilizing non-iridium active sites by non-stoichiometric oxide for acidic water oxidation at high current density
Source: PubMed Central journal article supplement (PMC10667250; doi:10.1038/s41467-023-43466-x), 2023-11-23
Supplement: 41467_2023_43466_MOESM1_ESM.pdf [file 41467_2023_43466_MOESM1_ESM.pdf]

## Supplementary Information

### **Stabilizing non-iridium active sites by non-stoichiometric oxide for acidic water oxidation at high current density**

Lingxi Zhou<sup>1,†</sup>, Yang-Fan Shao<sup>2,†</sup>, Fang Yin<sup>2</sup>, Jia Li<sup>2\*</sup>, Feiyu Kang<sup>2,3</sup> and Ruitao Lv<sup>1,3\*</sup>

<sup>1</sup> State Key Laboratory of New Ceramics and Fine Processing, School of Materials Science and Engineering, Tsinghua University, Beijing 100084, China

<sup>2</sup> Institute of Materials Research and Shenzhen Geim Graphene Center, Tsinghua Shenzhen International Graduate School, Tsinghua University, Shenzhen 518055, China

<sup>3</sup> Key Laboratory of Advanced Materials (MOE), School of Materials Science and Engineering, Tsinghua University, Beijing 100084, China

† These authors contributed equally: Lingxi Zhou and Yang-Fan Shao.

\* Corresponding authors. Email addresses:

li.jia@sz.tsinghua.edu.cn (J. Li)

lvruitao@tsinghua.edu.cn (R. Lv)

## Contents

|                                                                                                                                                              |    |
|--------------------------------------------------------------------------------------------------------------------------------------------------------------|----|
| <b>Supplementary Figure 1.</b> Optical photo of Ti foam (TF, left) and as-prepared Ru/TiO <sub>x</sub> (right).....                                          | 6  |
| <b>Supplementary Figure 2.</b> Morphology characterization of TF. ....                                                                                       | 6  |
| <b>Supplementary Figure 3.</b> SEM image of Ru/TiO <sub>x</sub> .....                                                                                        | 7  |
| <b>Supplementary Figure 4.</b> HRTEM image of Ru/TiO <sub>x</sub> . ....                                                                                     | 7  |
| <b>Supplementary Figure 5.</b> Phase characterization of different samples. ....                                                                             | 8  |
| <b>Supplementary Figure 6.</b> HAADF-STEM image of Ru/TiO <sub>x</sub> . ....                                                                                | 8  |
| <b>Supplementary Figure 7.</b> SEM images of bare TiO <sub>2</sub> /TF. ....                                                                                 | 9  |
| <b>Supplementary Figure 8.</b> HAADF-TEM images.....                                                                                                         | 9  |
| <b>Supplementary Figure 9.</b> Overpotentials comparison after <i>iR</i> correction.....                                                                     | 10 |
| <b>Supplementary Figure 10.</b> OER activity in 0.5 M H <sub>2</sub> SO <sub>4</sub> . ....                                                                  | 10 |
| <b>Supplementary Figure 11.</b> ECSA measurement of different samples. ....                                                                                  | 11 |
| <b>Supplementary Figure 12.</b> Specific OER activity of different samples.....                                                                              | 11 |
| <b>Supplementary Figure 13.</b> Mass activity of different samples. ....                                                                                     | 12 |
| <b>Supplementary Figure 14.</b> Turnover frequency (TOF) of different samples. ....                                                                          | 12 |
| <b>Supplementary Figure 15.</b> Tafel analysis. ....                                                                                                         | 13 |
| <b>Supplementary Figure 16.</b> Hydrophilicity of TF and Ru/TiO <sub>x</sub> . ....                                                                          | 14 |
| <b>Supplementary Figure 17.</b> Aerophobicity of TF and Ru/TiO <sub>x</sub> . ....                                                                           | 14 |
| <b>Supplementary Figure 18.</b> CVs of the as-prepared Ru/TiO <sub>x</sub> . ....                                                                            | 15 |
| <b>Supplementary Figure 19.</b> Electrocatalytic OER stability in 0.5 M H <sub>2</sub> SO <sub>4</sub> .....                                                 | 15 |
| <b>Supplementary Figure 20.</b> Ru content before and after OER stability test.....                                                                          | 16 |
| <b>Supplementary Figure 21.</b> PEMWE device.....                                                                                                            | 16 |
| <b>Supplementary Figure 22.</b> PEMWE performance. ....                                                                                                      | 17 |
| <b>Supplementary Figure 23.</b> Electrocatalytic OER performance in natural seawater.....                                                                    | 17 |
| <b>Supplementary Figure 24.</b> O 1s XPS spectra of different samples.....                                                                                   | 18 |
| <b>Supplementary Figure 25.</b> Ti 2 <i>p</i> and Ru 3 <i>p</i> XPS spectra of different samples.....                                                        | 18 |
| <b>Supplementary Figure 26.</b> The Ru <sup>n+</sup> /Ru <sup>0</sup> ratio.. ....                                                                           | 19 |
| <b>Supplementary Figure 27.</b> In-situ XPS device.. ....                                                                                                    | 19 |
| <b>Supplementary Figure 28.</b> In-situ XPS spectra of Ru/TiO <sub>x</sub> during the OER test. ....                                                         | 20 |
| <b>Supplementary Figure 29.</b> Variation of Ru <sup>n+</sup> /Ru <sup>0</sup> , Ti <sup>3+</sup> /Ti <sup>4+</sup> and O <sub>v</sub> /O <sub>L</sub> ..... | 20 |
| <b>Supplementary Figure 30.</b> Fitting of X-ray absorption results.. ....                                                                                   | 21 |
| <b>Supplementary Figure 31.</b> SEM images of Ru/TiO <sub>x</sub> before and after OER. ....                                                                 | 22 |

|                                                                                                                                                                                                                     |    |
|---------------------------------------------------------------------------------------------------------------------------------------------------------------------------------------------------------------------|----|
| <b>Supplementary Figure 33.</b> SEM images of control samples before and after OER.....                                                                                                                             | 24 |
| <b>Supplementary Figure 34.</b> TEM images of control samples before and after OER.....                                                                                                                             | 25 |
| <b>Supplementary Figure 35.</b> pH-dependence experiment.....                                                                                                                                                       | 25 |
| <b>Supplementary Figure 36.</b> Calculated Pourbaix diagrams.....                                                                                                                                                   | 26 |
| <b>Supplementary Figure 37.</b> Molecular dynamic simulation.....                                                                                                                                                   | 26 |
| <b>Supplementary Figure 38.</b> Theoretical calculation models of P-TiO <sub>2</sub> and V-TiO <sub>x</sub> .....                                                                                                   | 27 |
| <b>Supplementary Figure 39.</b> Theoretical calculation models of P-Ru/TiO <sub>2</sub> and V-Ru/TiO <sub>x</sub> .....                                                                                             | 27 |
| <b>Supplementary Figure 40.</b> Theoretical calculation models of RuO <sub>x</sub> /TiO <sub>x</sub> .....                                                                                                          | 28 |
| <b>Supplementary Figure 41.</b> Bader charge analysis.....                                                                                                                                                          | 28 |
| <b>Supplementary Figure 42.</b> Differential charge density analysis.....                                                                                                                                           | 29 |
| <b>Supplementary Figure 43.</b> Atomic structures of V <sub>10</sub> -RuO/TiO <sub>x</sub> with adsorbed OER intermediates.....                                                                                     | 29 |
| <b>Supplementary Figure 44.</b> Atomic structures of P-RuO <sub>1.6</sub> /TiO <sub>2</sub> with adsorbed OER intermediates.....                                                                                    | 30 |
| <b>Supplementary Figure 45.</b> Atomic structures of V <sub>20</sub> -RuO/TiO <sub>x</sub> with adsorbed OER intermediates.....                                                                                     | 30 |
| <b>Supplementary Figure 46.</b> PDOS analysis.....                                                                                                                                                                  | 31 |
| <b>Supplementary Figure 47.</b> TDOS analysis.....                                                                                                                                                                  | 31 |
| <br>                                                                                                                                                                                                                |    |
| <b>Supplementary Table 1.</b> Summary of electrocatalytic OER performance of the Ru/TiO <sub>x</sub> catalysts and state-of-the-art electrocatalysts in acidic media.....                                           | 32 |
| <b>Supplementary Table 2.</b> The mass loading (mg cm <sup>-2</sup> ) and weight percent (wt%) of noble metal in different samples (by ICP-MS measurement and EDS) and atomic percent (at%) by XPS measurement..... | 33 |
| <b>Supplementary Table 3.</b> OER mass activity comparison between the as-synthesized Ru/TiO <sub>x</sub> catalyst and other reported noble metal-based electrocatalysts in acidic media.....                       | 34 |
| <b>Supplementary Table 4.</b> TOF of Ru/TiO <sub>x</sub> with previously reported OER catalysts in acid.....                                                                                                        | 35 |
| <b>Supplementary Table 5.</b> TOF of catalysts using different normalization methods.....                                                                                                                           | 35 |
| <b>Supplementary Table 6.</b> Comparison of the PEM electrolyzer performance with those previously reported.....                                                                                                    | 36 |
| <b>Supplementary Table 7.</b> Concentrations of the major constituents in natural seawater.....                                                                                                                     | 37 |
| <b>Supplementary Table 8.</b> High resolution Ru 3 <i>d</i> XPS peak fitting parameters of different samples before and after OER.....                                                                              | 38 |
| <b>Supplementary Table 9.</b> High resolution Ru 3 <i>d</i> , Ti 2 <i>p</i> and O 1 <i>s</i> XPS peak fitting parameters of Ru/TiO <sub>x</sub> at applied potential during 1.0-1.7 V vs. RHE.....                  | 39 |
| <b>Supplementary Table 10.</b> Summary of Ru <i>K</i> -edge adsorption energy ( <i>E</i> <sub>0</sub> ) and valence states for Ru foil, RuO <sub>2</sub> , Ru/TiO <sub>x</sub> before and after OER.....            | 41 |
| <b>Supplementary Table 11.</b> Structural parameters obtained from the curve-fitting analysis of the Ru <i>K</i> -edge EXAFS spectra.....                                                                           | 41 |

**Supplementary Table 12.** Integrated COHP (ICOHP) value for adsorption \*O of Ru-O in different models. .... 41

**Supplementary References**..... 42

## Supplementary Note 1:

**Calculation of turnover frequency (TOF):** The TOF value based on inductively coupled plasma mass spectrometry (ICP-MS) results (bulk TOF) and electrochemical active surface area (ECSA) values (ECSA TOF) were calculated and compared. The Bulk TOF value was calculated by following formula:

$$\text{TOF} = \frac{\# \text{ Total Oxygen Turn Overs per geometric area}}{\# \text{ Active sites per geometric area}} \quad (1)$$

*# Total oxygen turn overs per geometric area*

$$\begin{aligned} &= \left( J \frac{\text{mA}}{\text{cm}^2} \right) \left( \frac{1 \text{ C s}^{-1}}{1000 \text{ mA}} \right) \left( \frac{1 \text{ mol O}_2}{4 \text{ mol e}^-} \right) \left( \frac{6.022 \times 10^{23} \text{ O}_2 \text{ atoms}}{1 \text{ mol O}_2} \right) \left( \frac{1 \text{ mol e}^-}{96485.3 \text{ C}} \right) \\ &= 1.56 \times 10^{15} \left( \frac{\text{O}_2 \text{ s}^{-1}}{\text{cm}^2} \right) \text{ per } \left( \frac{\text{mA}}{\text{cm}^2} \right) \end{aligned} \quad (2)$$

*# Active sites per geometric area*

$$= \left( \frac{\text{mass loading of Ru } (\text{g}/\text{cm}^2)}{\text{Ru Mw } (\text{g}/\text{mol})} \right) \left( \frac{6.022 \times 10^{23} \text{ Ru atoms}}{1 \text{ mol Ru}} \right) \quad (3)$$

The ECSA TOF value was calculated by Equation (2) and the following formula:

$$\text{TOF} = \frac{\# \text{ Total Oxygen Turn Overs per geometric area}}{\# \text{ Active sites per real area}} \quad (4)$$

*# Active sites per real surface area:*

$$= \left( \frac{\text{number of active sites / unit cell}}{\text{unit cell volume}} \right)^{2/3} \quad (5)$$

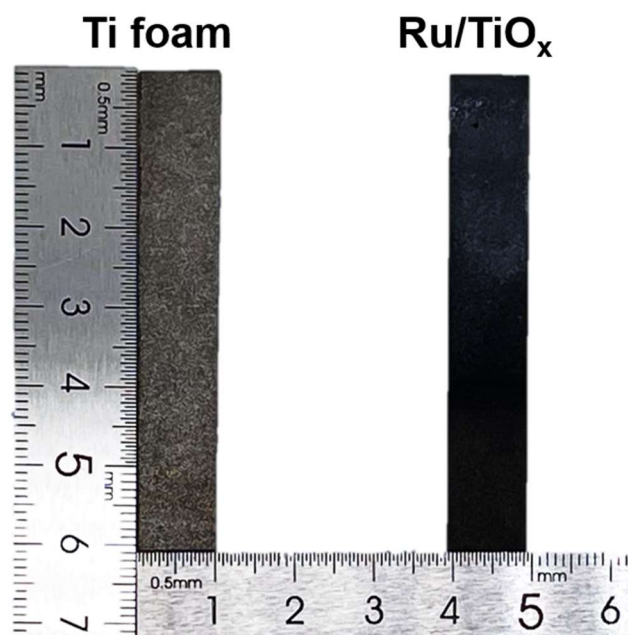

**Supplementary Figure 1.** Optical photo of Ti foam (TF, left) and as-prepared Ru/TiO<sub>x</sub> (right).

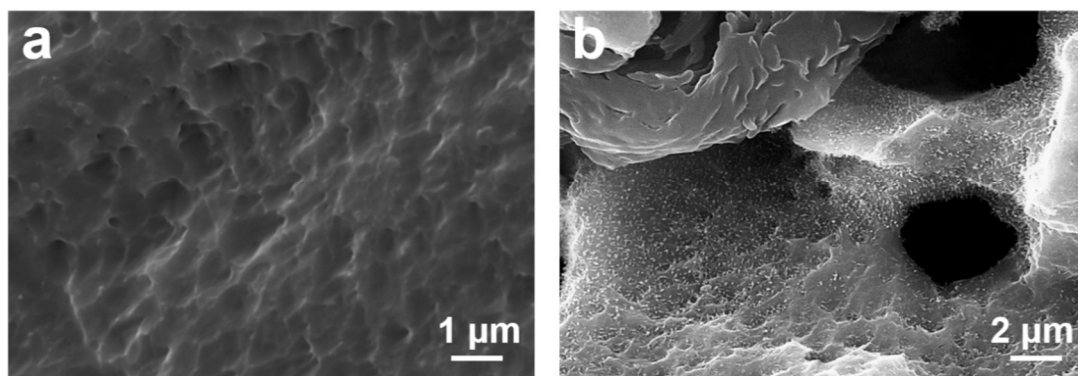

**Supplementary Figure 2.** Morphology characterization of TF. Scanning electron microscopy (SEM) image of pristine TF (a) and TF etched in the solution of HCl (18 wt%) at 363K for 15 min (b).

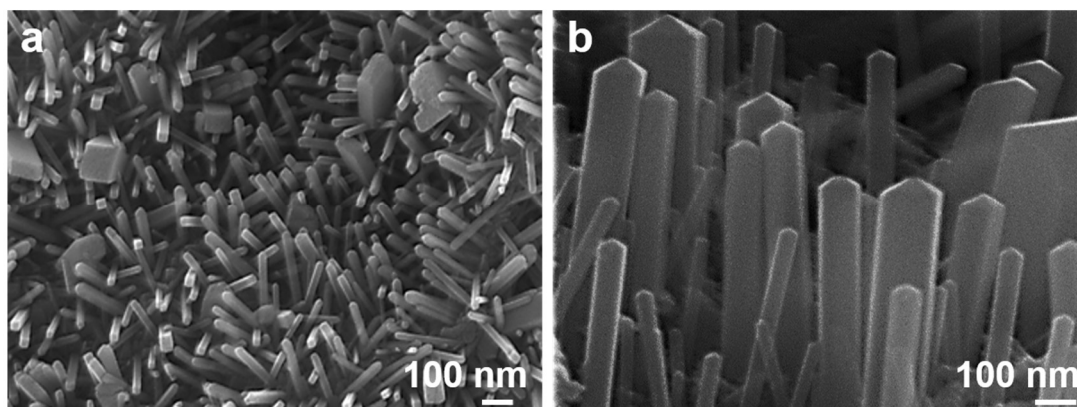

**Supplementary Figure 3.** SEM image of Ru/TiO<sub>x</sub> with top-view (a) and side-view (b).

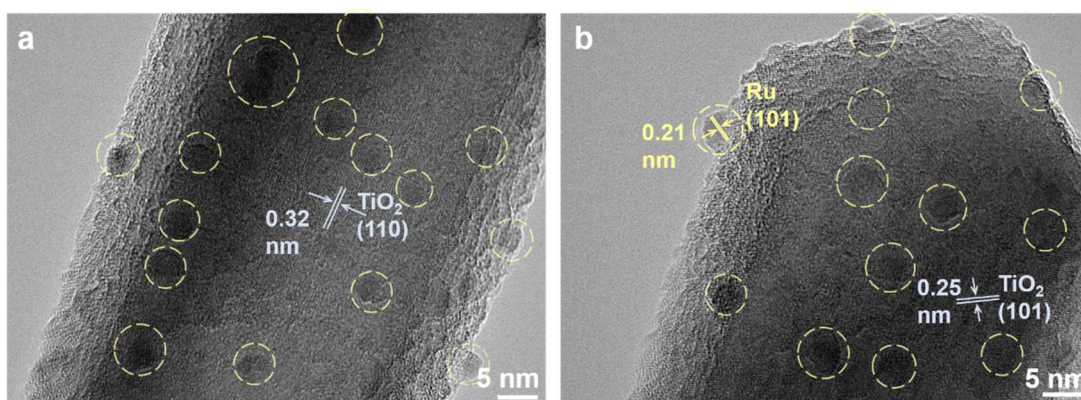

**Supplementary Figure 4.** High resolution transmission electron microscopy (HRTEM) image of Ru/TiO<sub>x</sub> with body-part (a) and top-part (b). (Ru nanoparticles are circled in yellow)

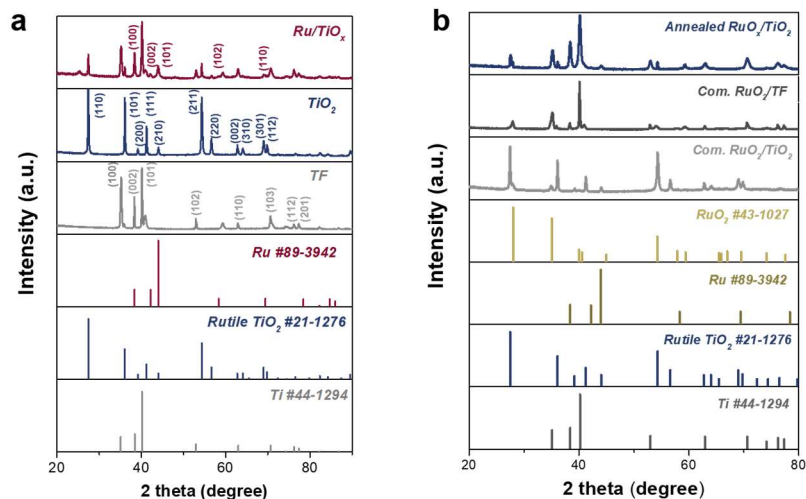

**Supplementary Figure 5. Phase characterization of different samples. a**, X-ray diffraction (XRD) patterns of Ru/TiO<sub>x</sub>, TiO<sub>2</sub> and TF. **b**, XRD patterns of annealed RuO<sub>x</sub>/TiO<sub>2</sub>, commercial RuO<sub>2</sub>/TiO<sub>2</sub> and commercial RuO<sub>x</sub>/TiO<sub>2</sub> (com. denotes commercial).

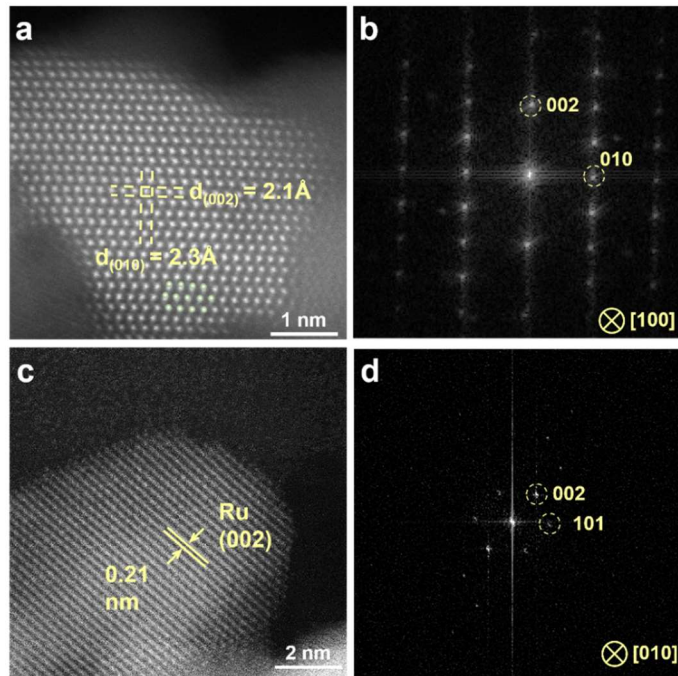

**Supplementary Figure 6. Aberration-corrected high angle annular dark field-scanning TEM (HAADF-STEM) image of Ru/TiO<sub>x</sub> with [100] axis (a) and corresponding fast Fourier transforms (FFT) results (b). c, [010] axis and d) corresponding FFT results.**



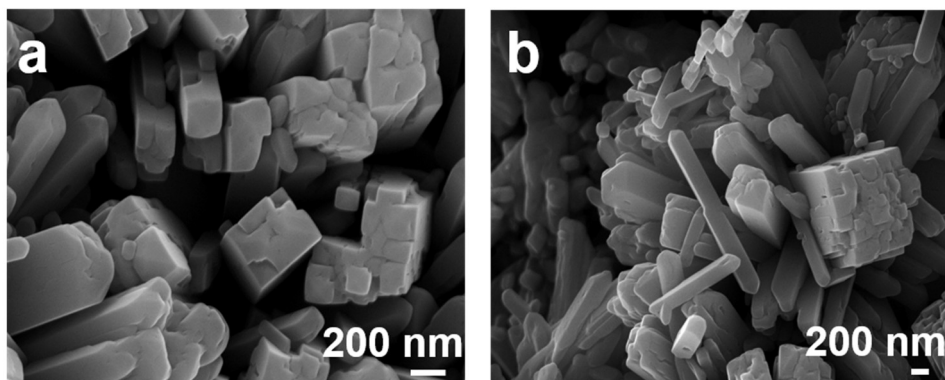

**Supplementary Figure 7.** SEM images of bare TiO<sub>2</sub>/TF with different magnifications

(a,b).

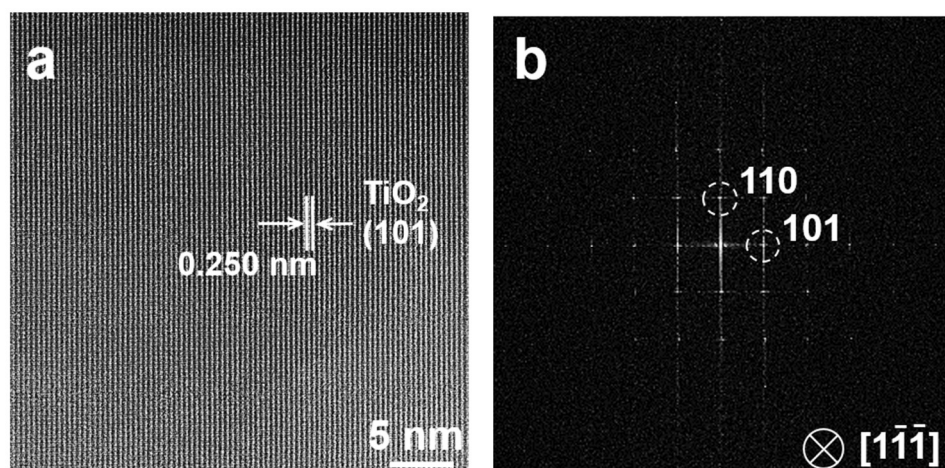

**Supplementary Figure 8.** HAADF-TEM image of bare TiO<sub>2</sub>/TF (a) and corresponding FFT results (b).

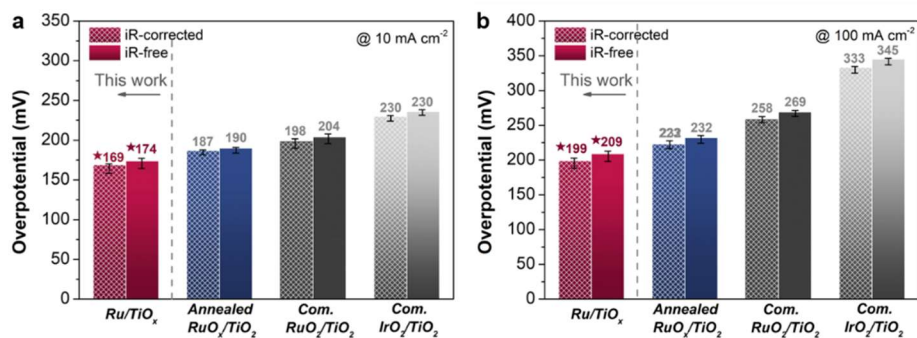

**Supplementary Figure 9.** Overpotentials of different samples to reach 10 mA cm<sup>-2</sup> (a) and 100 mA cm<sup>-2</sup> (b) before (smooth) and after (grid filled) *iR* correction. (Error bar: standard error of three repeated measurements).

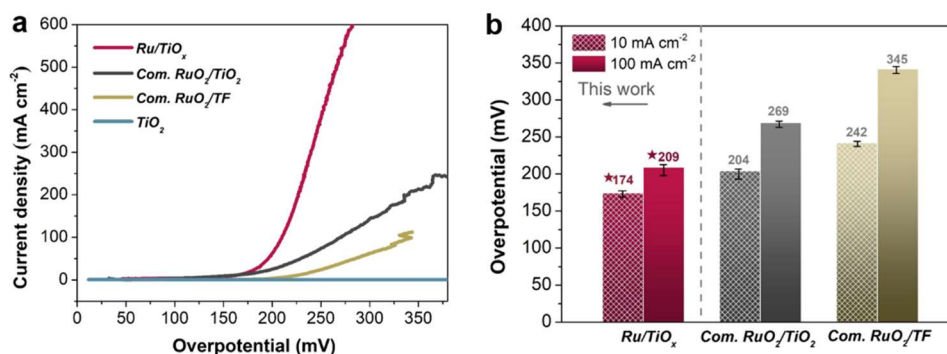

**Supplementary Figure 10.** Electrocatalytic oxygen evolution reaction (OER) activity in 0.5 M H<sub>2</sub>SO<sub>4</sub>. a, Linear sweep voltammetry (LSV) curves and b, comparison of overpotentials at 10 and 100 mA cm<sup>-2</sup> for Ru/TiO<sub>x</sub>, commercial RuO<sub>2</sub>/TiO<sub>2</sub>, commercial RuO<sub>2</sub>/TF and bare TF. Here com. denotes commercial. (Error bar: standard error of three repeated measurements).

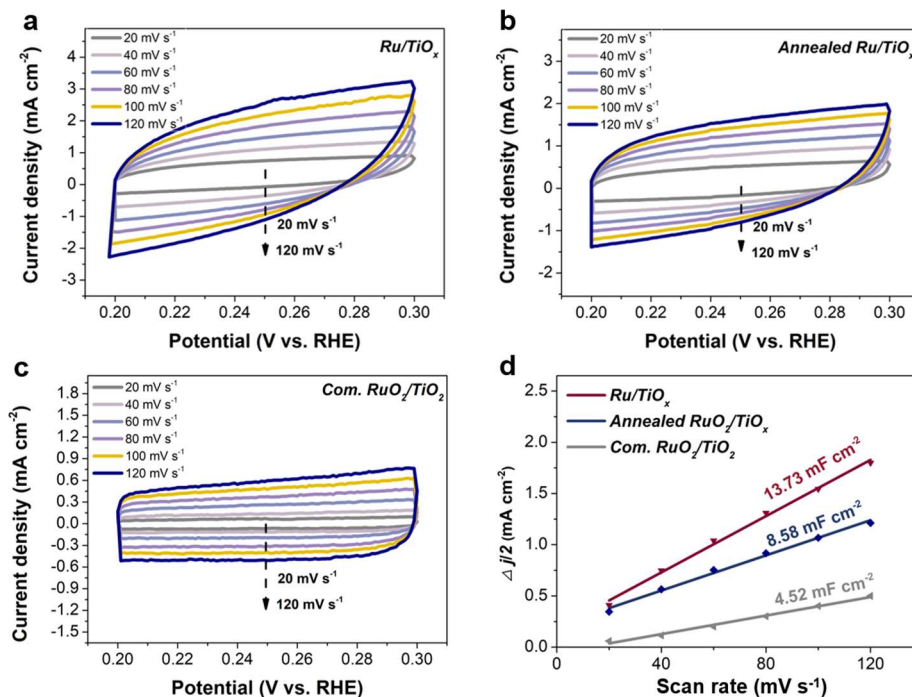

**Supplementary Figure 11. ECSA measurement of different samples.** a-c, Cyclic voltammetry (CV) curves of Ru/TiO<sub>x</sub> (a), annealed Ru/TiO<sub>x</sub> (b) and commercial RuO<sub>2</sub>/TiO<sub>2</sub> (c). d, linear relationships between capacitive current and scan rate, the  $C_{dl}$  are absolute value of the slope of the liner fits to the data.

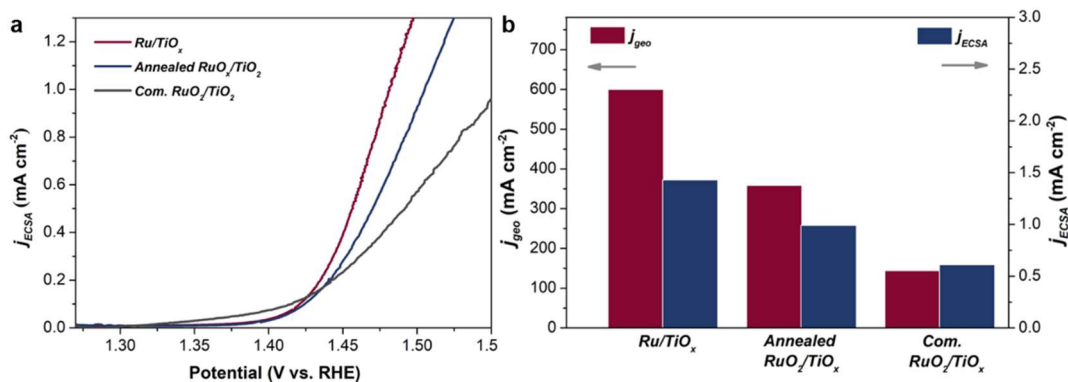

**Supplementary Figure 12. Specific OER activity of different samples.** a, Normalized linear sweep voltammetry curves to ECSA. b, The normalized OER current densities of catalysts (at 1.5 V vs. RHE) to the electrode geometrical area ( $j_{geo}$ ) and ECSA ( $j_{ECSA}$ ).

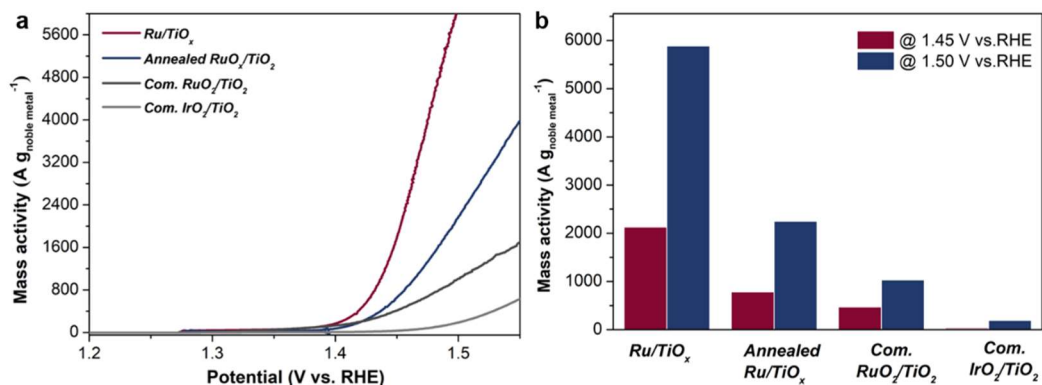

**Supplementary Figure 13. Mass activity of different samples. a**, Mass activity of Ru/TiO<sub>x</sub>, annealed RuO<sub>x</sub>/TiO<sub>2</sub>, commercial RuO<sub>2</sub>/TiO<sub>2</sub> and commercial IrO<sub>2</sub>/TiO<sub>2</sub> catalysts as function of applied potential in 0.5 M H<sub>2</sub>SO<sub>4</sub>. **b**, The corresponding mass activity values at potential of 1.45 and 1.50 V vs. RHE.

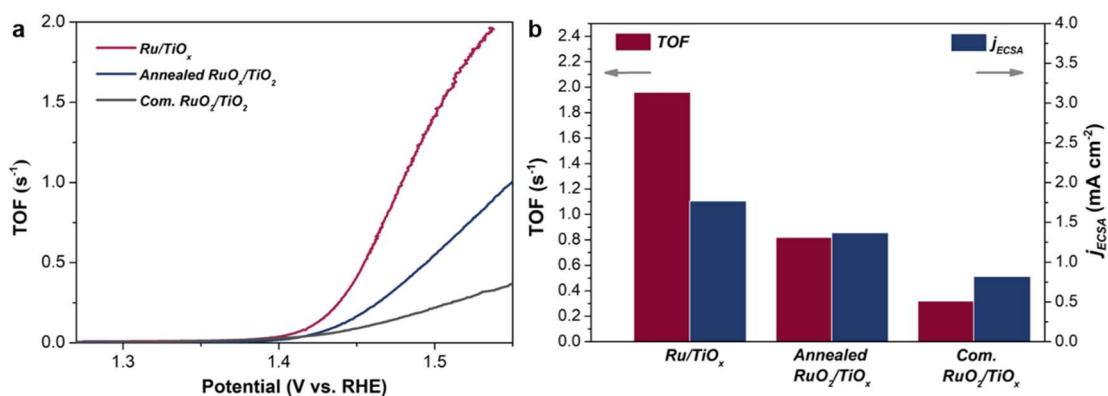

**Supplementary Figure 14. Turnover frequency (TOF) of different samples. a**, Potential-dependent TOF curves. **b**, The corresponding bar graph of the ECSA-normalized current density (blue) and TOF values (red) at the overpotential of 300 mV.

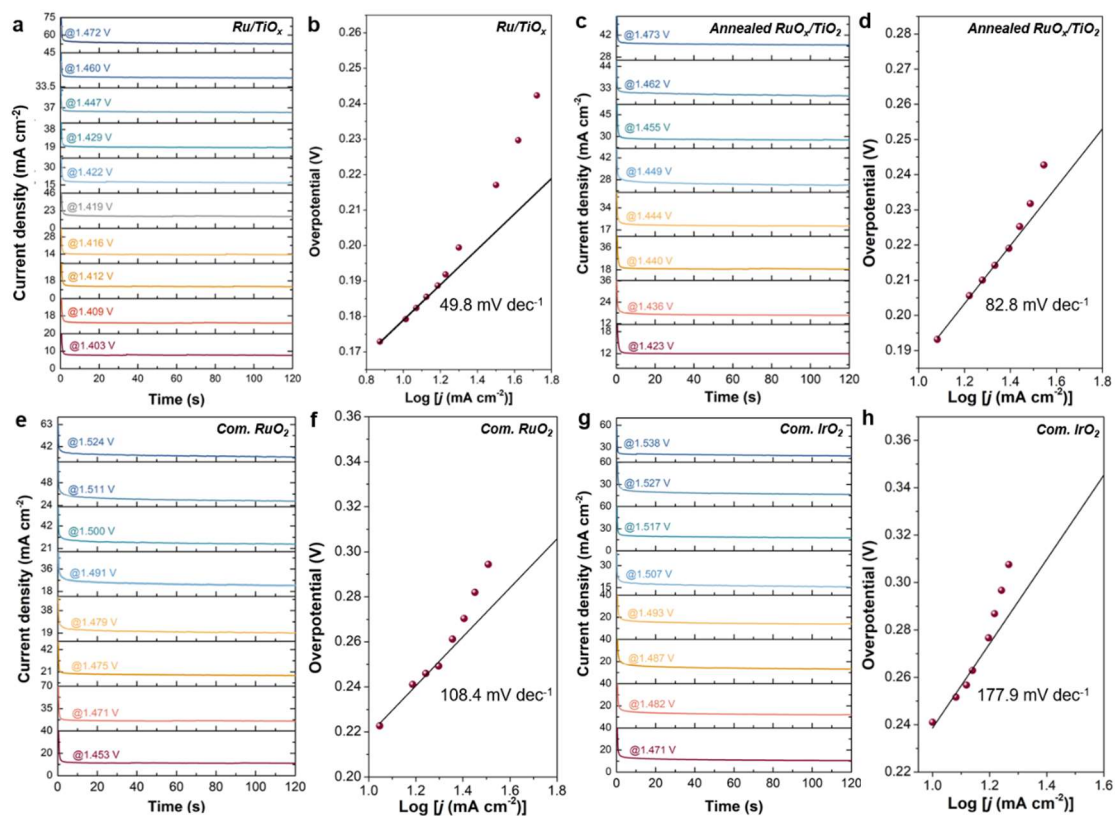

**Supplementary Figure 15.** Chronoamperometry responses of activity stabilized Ru/TiO<sub>x</sub> (a), annealed RuO<sub>x</sub>/TiO<sub>2</sub> (c), com. RuO<sub>2</sub> (e) and com. IrO<sub>2</sub> (g) in 0.5 M H<sub>2</sub>SO<sub>4</sub>. The corresponding steady-state polarization curves (Tafel plots) of Ru/TiO<sub>x</sub> (b), annealed RuO<sub>x</sub>/TiO<sub>2</sub> (d), com. RuO<sub>2</sub> (f) and com. IrO<sub>2</sub> (h) constructed from OER current densities sampled from steady-state chronoamperometry responses.

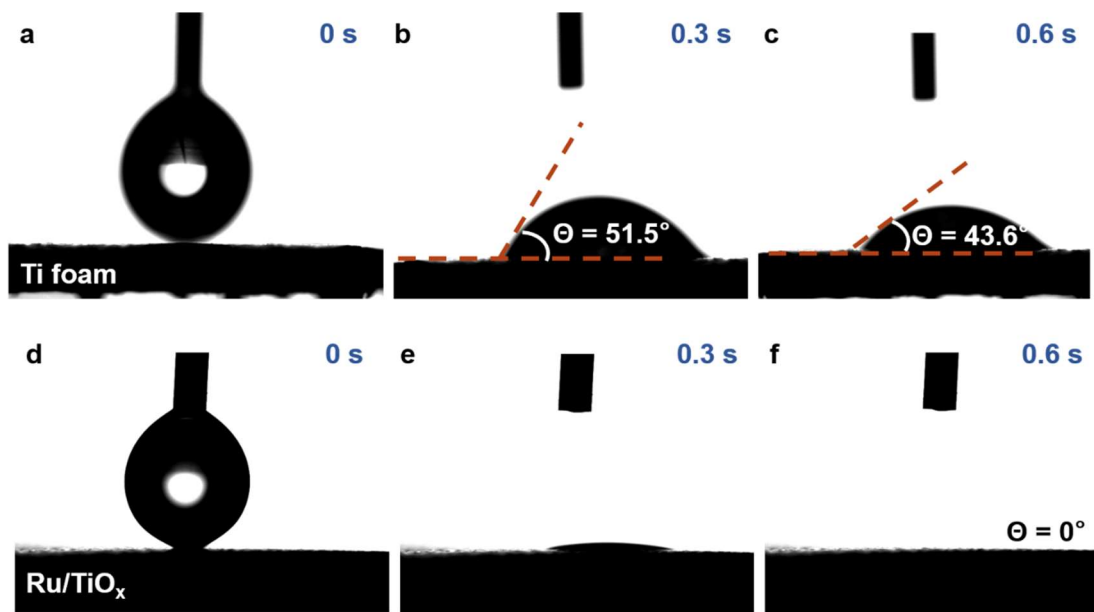

Supplementary Figure 16. Hydrophilicity of TF and Ru/TiO<sub>x</sub>. The contact angles of the water droplets on TF (a-c) and Ru/TiO<sub>x</sub> (d-f).

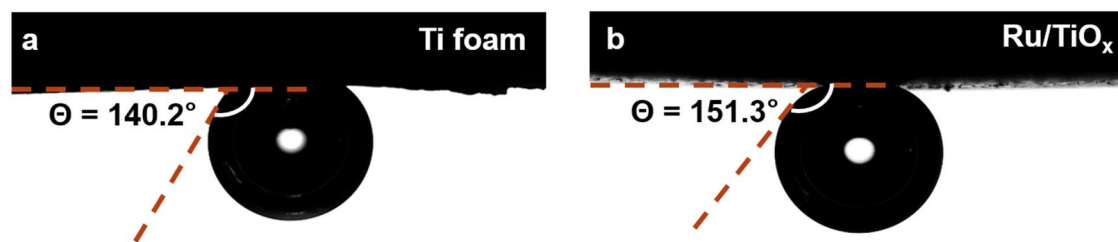

Supplementary Figure 17. Aerophobicity of TF and Ru/TiO<sub>x</sub>. The bubble contact angles on the surfaces of TF (a) and Ru/TiO<sub>x</sub> (b).

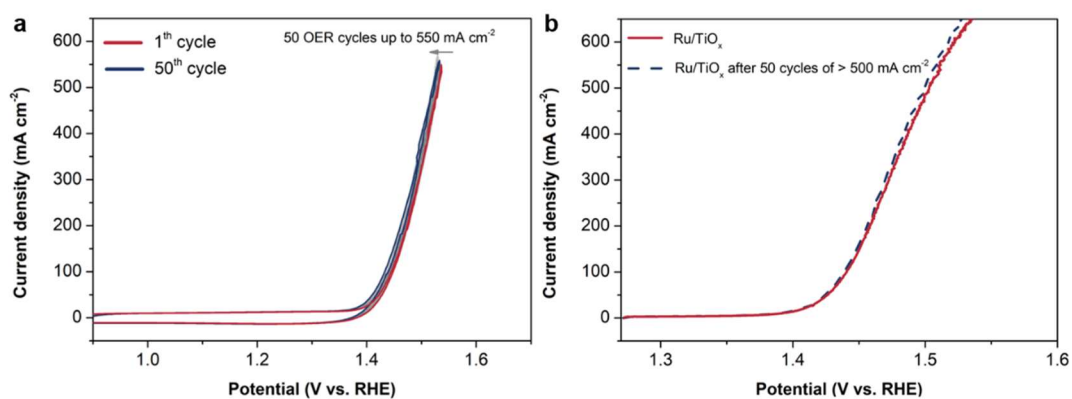

**Supplementary Figure 18.** CVs of the as-prepared Ru/TiO<sub>x</sub> up to 550 mA cm<sup>-2</sup> for 50 cycles (a) and polarization curves of Ru/TiO<sub>x</sub> before and after 50 CV cycles (b).

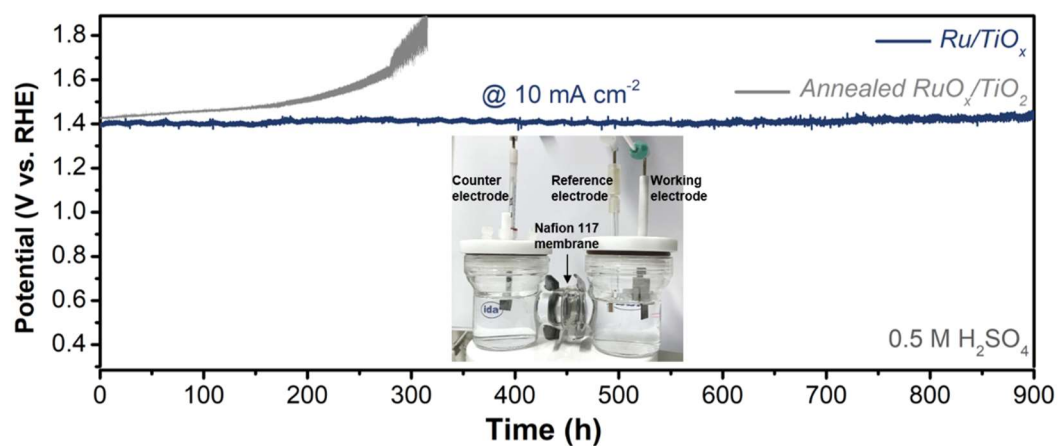

**Supplementary Figure 19.** Electrocatalytic OER stability in 0.5 M H<sub>2</sub>SO<sub>4</sub>.

Chronoamperometric curve obtained at a current density of 10 mA cm<sup>-2</sup> for the as-prepared Ru/TiO<sub>x</sub> and the annealed RuO<sub>x</sub>/TiO<sub>2</sub> in 0.5 M H<sub>2</sub>SO<sub>4</sub>. A photograph of a homemade H-type cell is shown in the inset, in which the anode and cathode sides are separated by a Nafion 117 membrane.

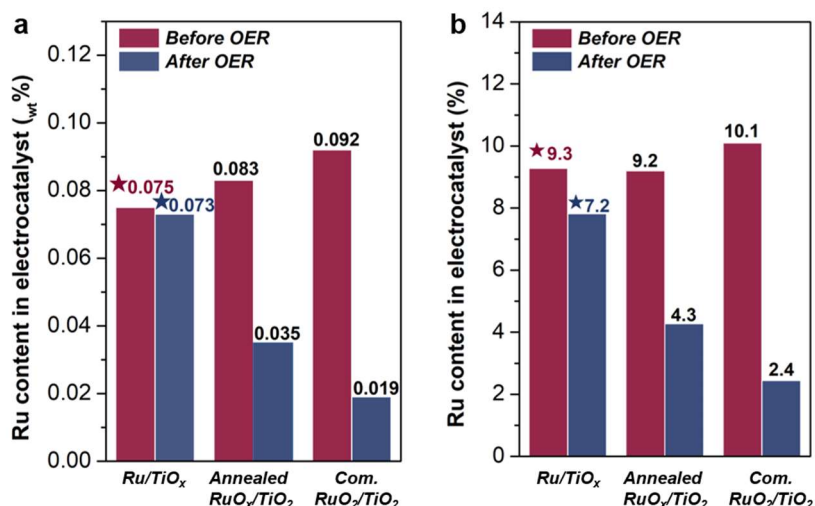

**Supplementary Figure 20. Ru content of different electrocatalyst before and after OER stability test.** Ru content in electrocatalyst before and after OER stability test determined by inductively coupled plasma-mass spectrometry (ICP-MS) (a) and X-ray photoelectron spectroscopy (XPS) (b).

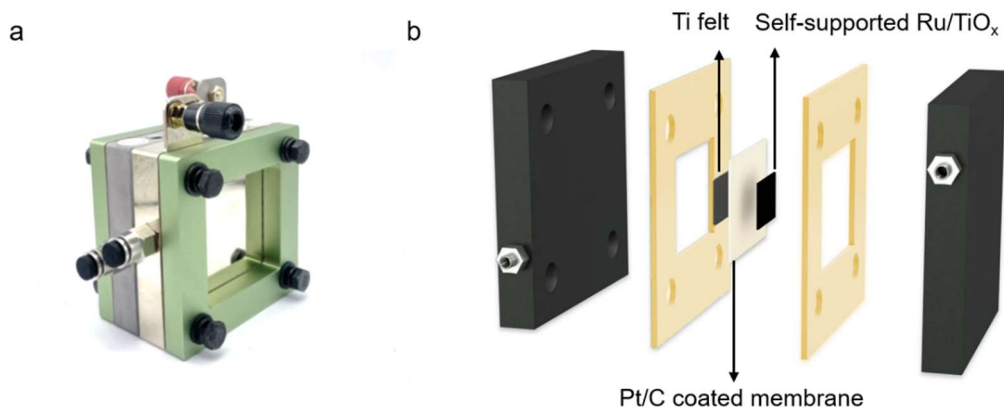

**Supplementary Figure 21.** Optical photo (a) and schematic diagram (b) of the proton-exchange membrane water electrolyzers (PEMWE).



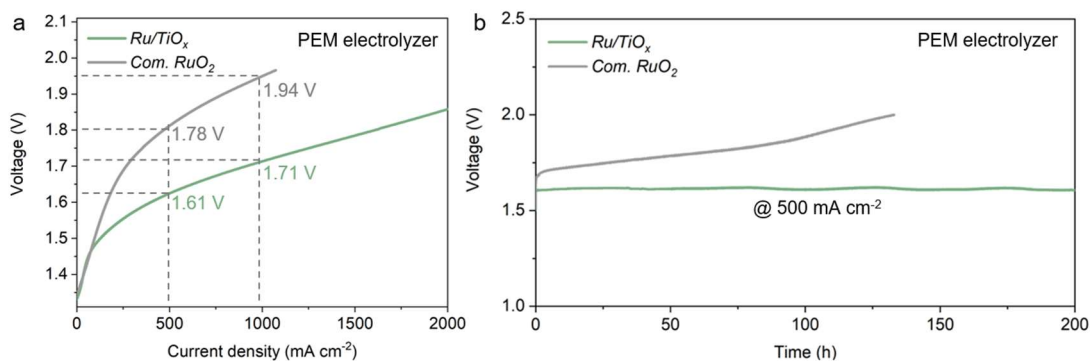

**Supplementary Figure 22. a**, Polarization curves of PEMWE utilizing the as-synthesized Ru/TiO<sub>x</sub> or commercial RuO<sub>2</sub> as an anode and commercial Pt/C as a cathode. **b**, The corresponding stability test of the PEMWE at 500 mA cm<sup>-2</sup>.

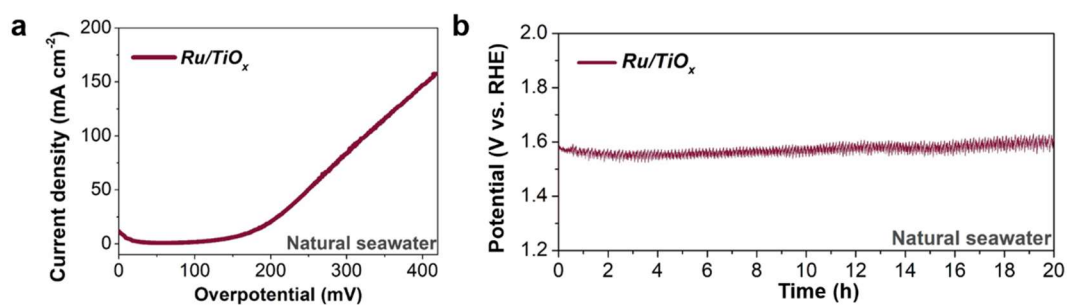

**Supplementary Figure 23. Electrocatalytic OER performance in natural seawater.**

LSV curve (**a**) and chronoamperometric curve obtained at a current density of 100 mA cm<sup>-2</sup> for Ru/TiO<sub>x</sub> in natural seawater (**b**).

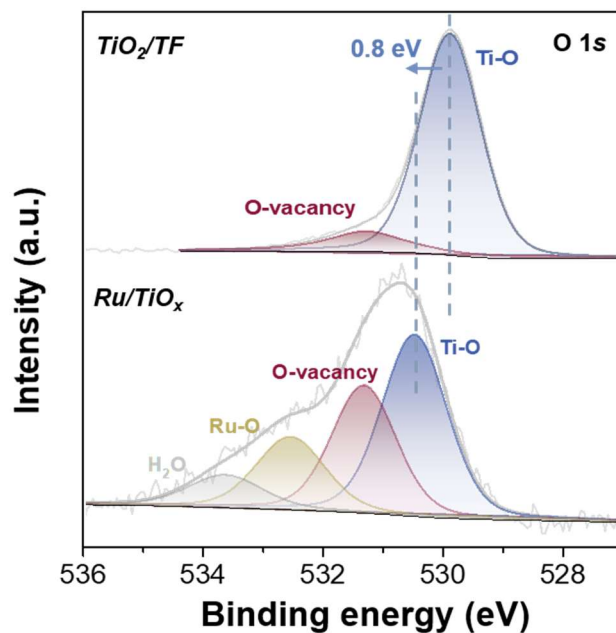

**Supplementary Figure 24. O 1s XPS spectra of different samples.** XPS spectra of  $TiO_2/TF$  (up) and  $Ru/TiO_x$  (down).

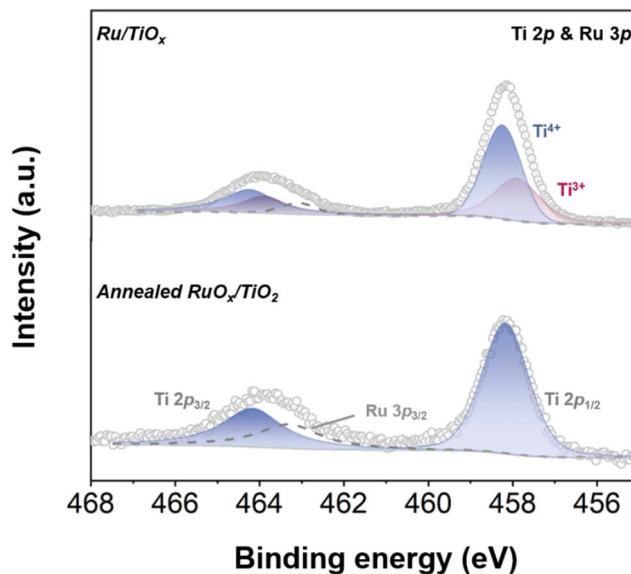

**Supplementary Figure 25. Ti 2p and Ru 3p XPS spectra of different samples.** High-resolution Ti 2p and Ru 3p XPS image of  $Ru/TiO_x$  (up) and annealed  $RuO_x/TiO_2$  (down).

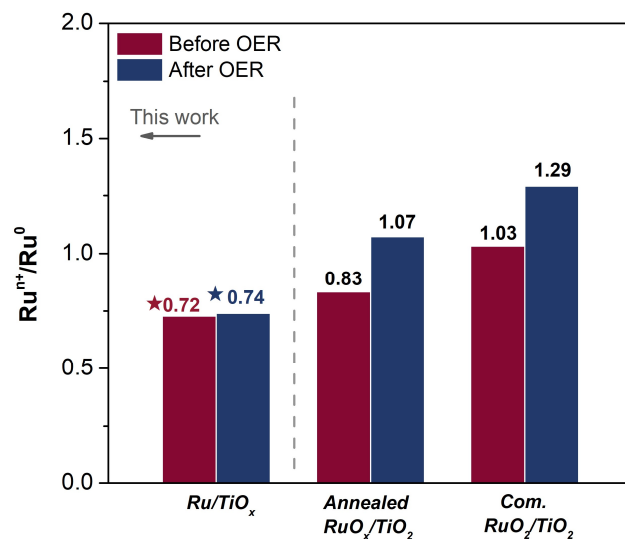

**Supplementary Figure 26.** The  $Ru^{n+}/Ru^0$  ratio obtained for  $Ru/TiO_x$ , annealed  $RuO_x/TiO_2$  and commercial  $RuO_2/TiO_2$ .

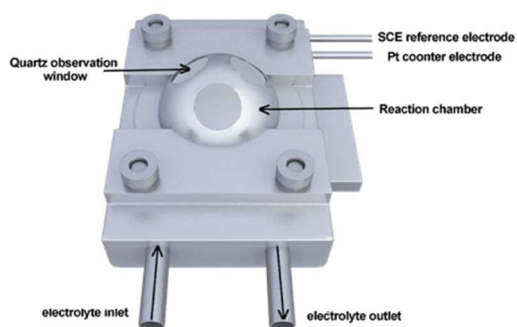

**Supplementary Figure 27.** The schematic diagram of the in-situ XPS analysis of  $Ru/TiO_x$ .

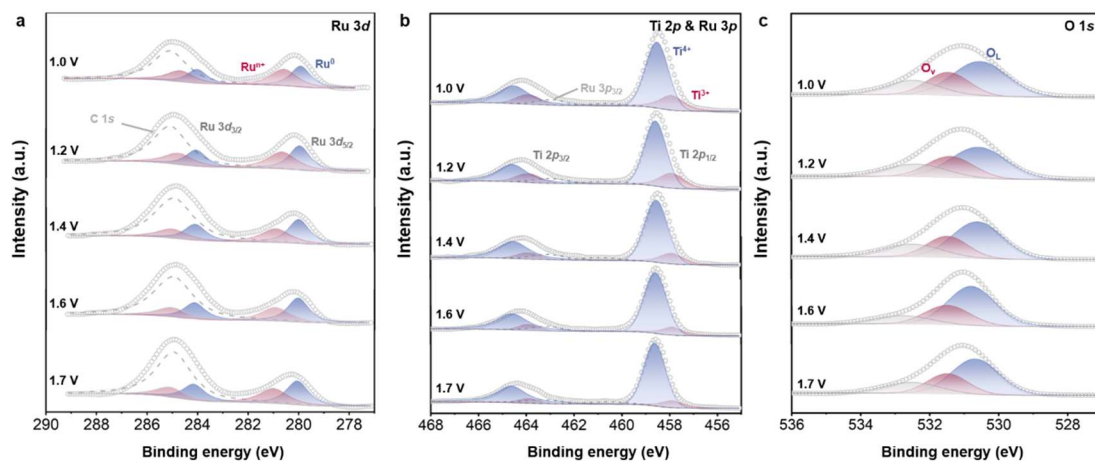

**Supplementary Figure 28.** In-situ XPS spectra of Ru/TiO<sub>x</sub> during the OER test.

In-situ Ru 3d (a), Ti 2p & Ru 3p (b) and O 1s (c) XPS spectra recorded of the as-prepared Ru/TiO<sub>x</sub> at applied potential during 1.0-1.7 V vs. RHE.

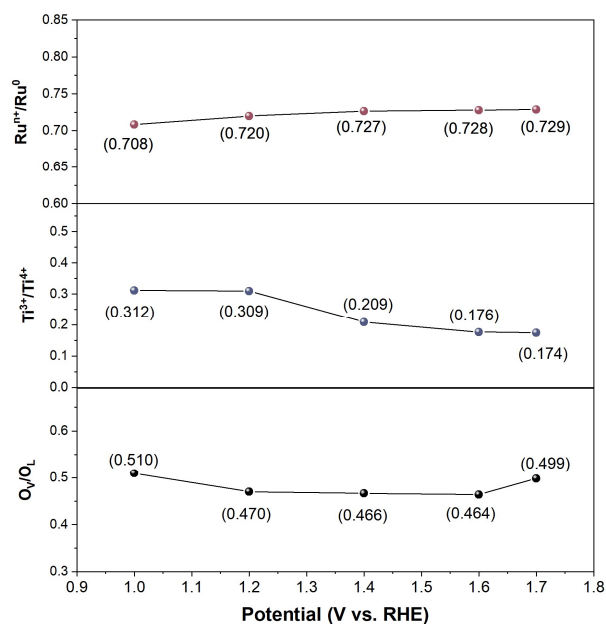

**Supplementary Figure 29.** Variation of Ru<sup>n+</sup>/Ru<sup>0</sup>, Ti<sup>3+</sup>/Ti<sup>4+</sup> and O<sub>v</sub>/O<sub>L</sub> (oxygen vacancy/lattice oxygen) ratio from in-situ XPS measurement.

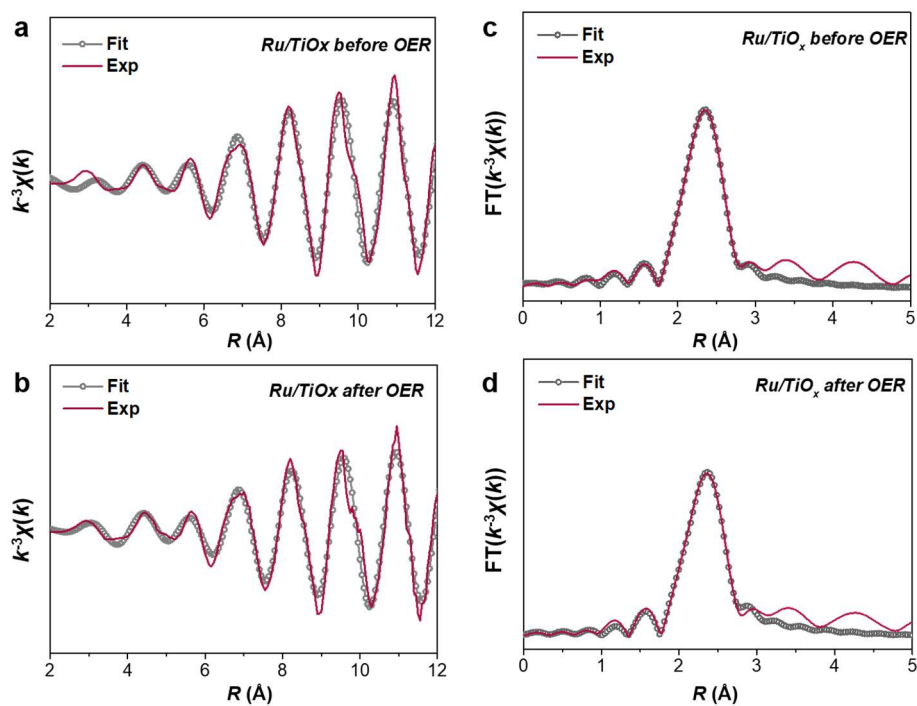

**Supplementary Figure 30. Fitting of X-ray absorption results.** The EXAFS curves of the Ru *K*-edge experimental data (denoted as Exp) and fitting results (denoted as Fit) of Ru/TiO<sub>x</sub> before and after OER in  $k^3$ -weighted  $k$ -space (**a,b**) and  $R$  space (**c,d**).

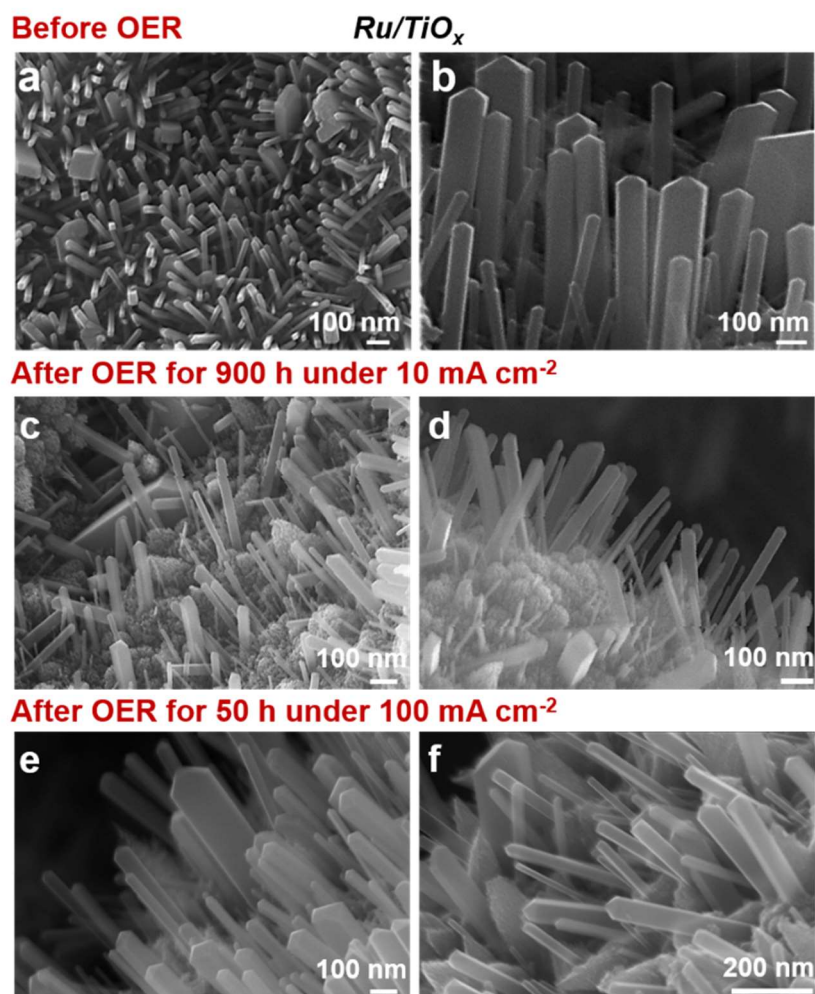

**Supplementary Figure 31. SEM images of Ru/TiO<sub>x</sub> before and after OER stability tests.** SEM images of Ru/TiO<sub>x</sub> (a,b) and Ru/TiO<sub>x</sub> after the chronoamperometric test under 10 mA cm<sup>-2</sup> for 900 h (c,d) and 100 mA cm<sup>-2</sup> for 50 h (e,f).

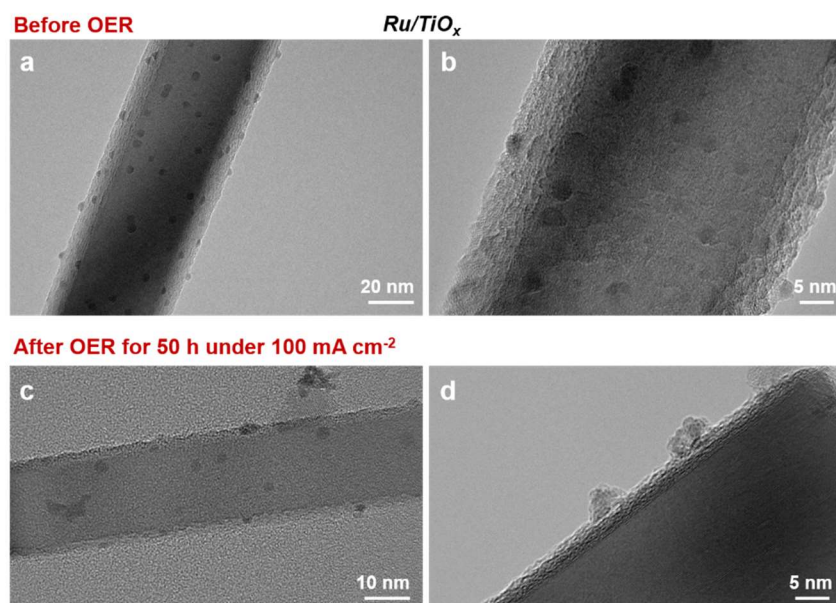

**Supplementary Figure 32. TEM images of Ru/TiO<sub>x</sub> before and after OER stability tests.** TEM images of Ru/TiO<sub>x</sub> (**a,b**) and Ru/TiO<sub>x</sub> after the chronoamperometric test under 100 mA cm<sup>-2</sup> for 50 h (**c,d**).

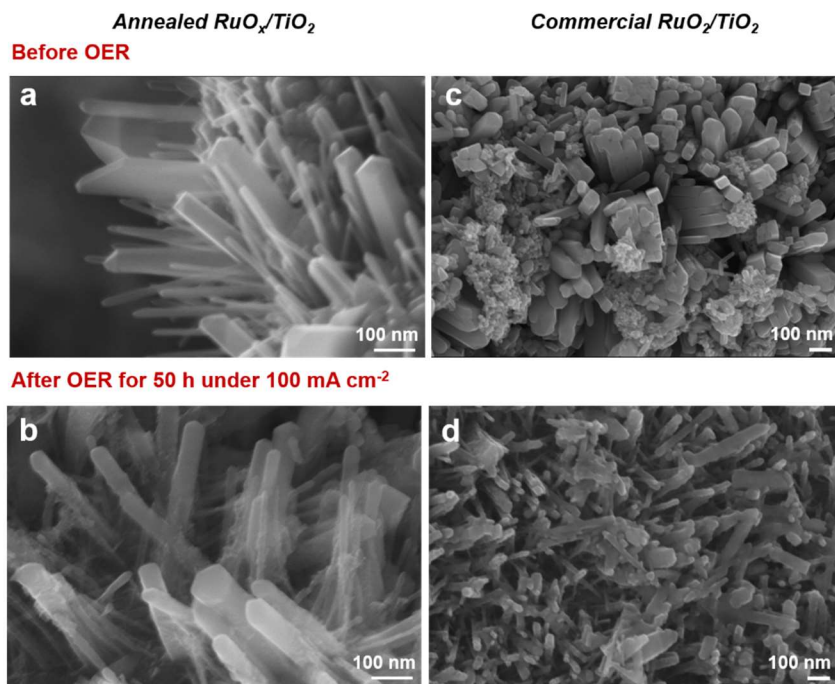

**Supplementary Figure 33. SEM images of control samples before and after OER stability tests. a,b**, SEM images of annealed RuO<sub>x</sub>/TiO<sub>2</sub> before and after OER under 100 mA cm<sup>-2</sup> for 50 h. **c,d**, SEM images of commercial RuO<sub>x</sub>/TiO<sub>2</sub> before and after the chronoamperometric test under 100 mA cm<sup>-2</sup> for 50 h.



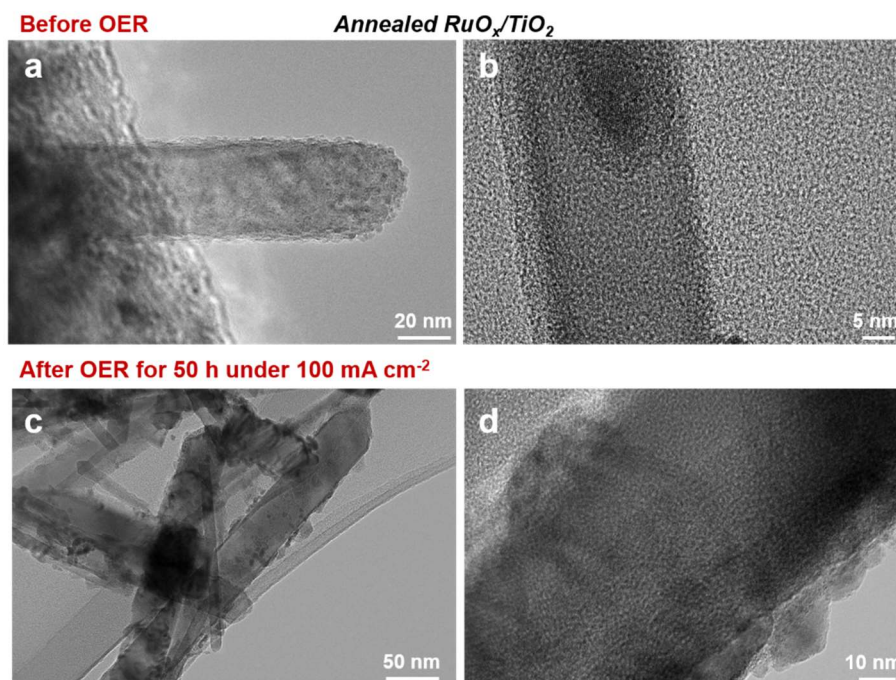

**Supplementary Figure 34. TEM images of control samples before and after OER stability tests.** TEM images of Ru/TiO<sub>x</sub> (a,b) and Ru/TiO<sub>x</sub> after the chronoamperometric test under 100 mA cm<sup>-2</sup> for 50 h (c,d).

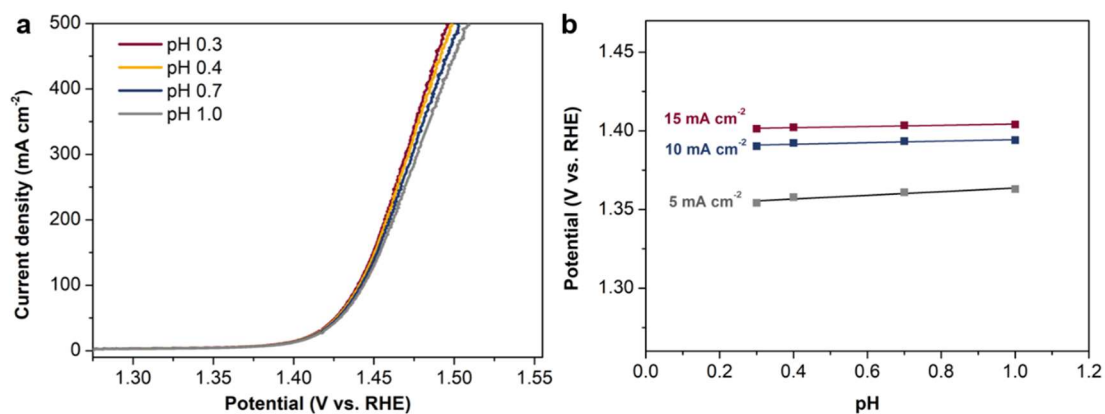

**Supplementary Figure 35. pH-dependence experiment.** a, OER activity of Ru/TiO<sub>x</sub> with varying pH. b, pH dependence on the OER potential at different current densities for Ru/TiO<sub>x</sub>.

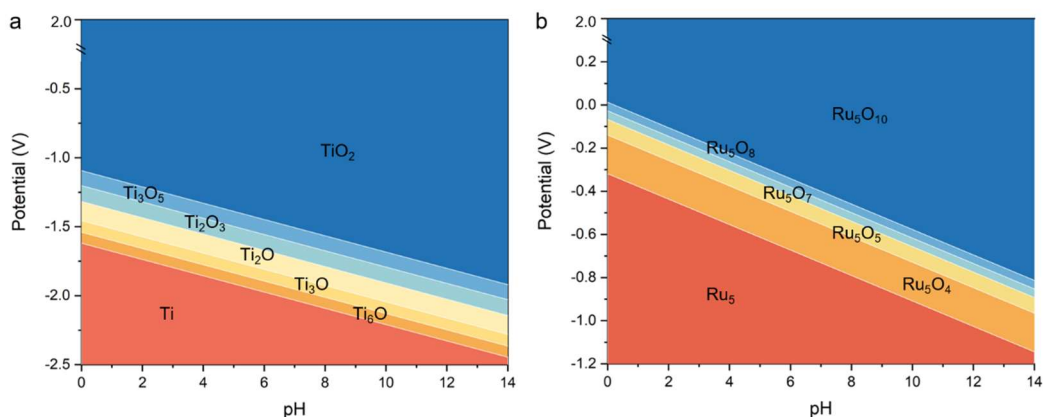

**Supplementary Figure 36.** Calculated Pourbaix diagrams of Ti (a) and Ru (b) systems.

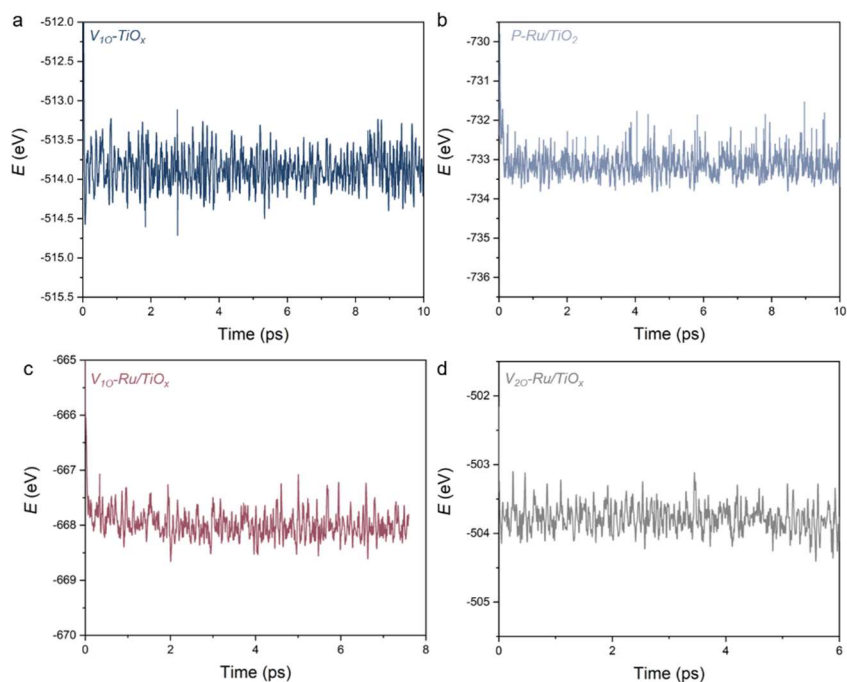

**Supplementary Figure 37.** The total energy of  $V_{10}$ - $TiO_2$  (a), P-Ru/ $TiO_2$  (b),  $V_{10}$ -Ru/ $TiO_x$  (c) and  $V_{20}$ -Ru/ $TiO_x$  (d) as a function of molecular dynamic (MD) time at a temperature of 300 K. ( $V_{10}$  and  $V_{20}$  denotes 1 and 2 oxygen vacancies, respectively; P denotes perfect structure without oxygen vacancy)

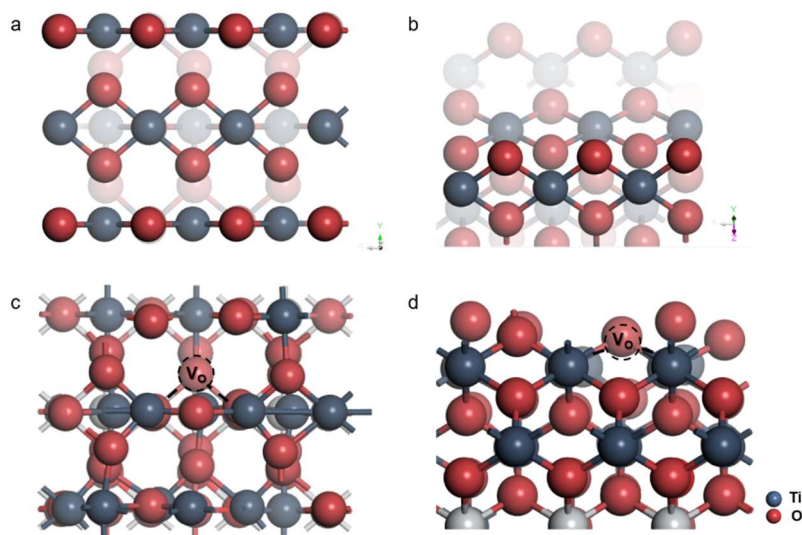

**Supplementary Figure 38. Theoretical calculation models of P-TiO<sub>2</sub> and V-TiO<sub>x</sub>.** Top view and side view of P-TiO<sub>2</sub> (a,b) and V<sub>10</sub>-TiO<sub>x</sub> (c,d), respectively. (The blue and red balls represent Ti and O atoms, respectively).

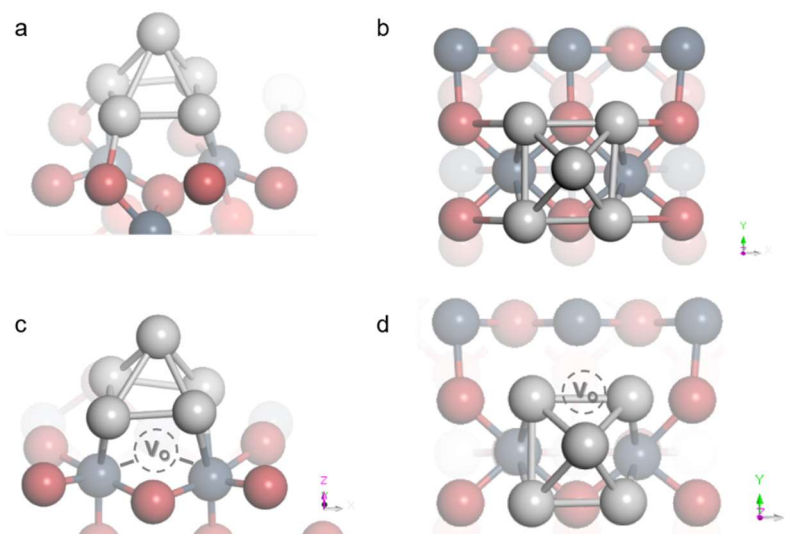

**Supplementary Figure 39. Theoretical calculation models of P-Ru/TiO<sub>2</sub> and V<sub>10</sub>-Ru/TiO<sub>x</sub>.** Top view and side view of P-Ru/TiO<sub>2</sub> (a,b) and V<sub>10</sub>-Ru/TiO<sub>x</sub> (c,d), respectively. (The gray, blue and red balls represent Ru, Ti and O atoms, respectively).

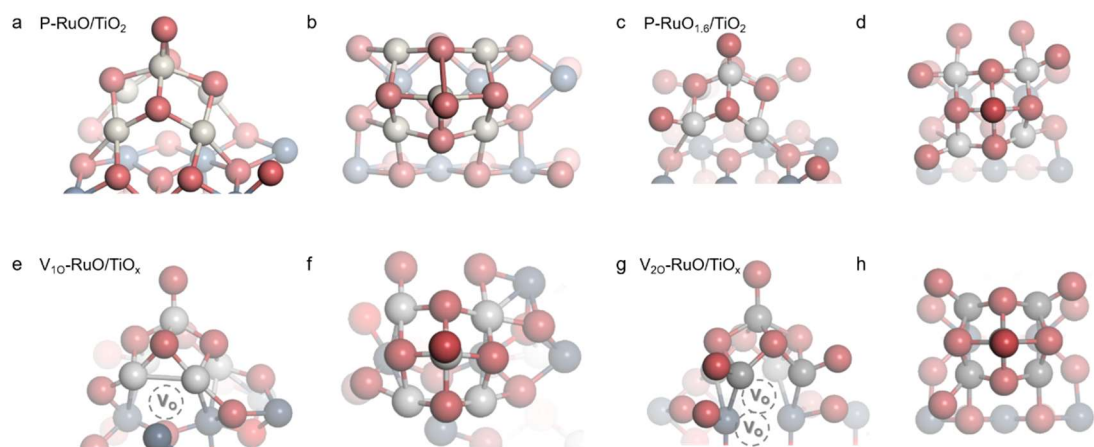

**Supplementary Figure 40. Theoretical calculation models of  $\text{RuO}_x/\text{TiO}_x$ .** Top view and side view of P-RuO/TiO<sub>2</sub> (**a,b**), P-RuO<sub>1.6</sub>/TiO<sub>2</sub> (**c,d**), V<sub>10</sub>-RuO/TiO<sub>x</sub> (**e,f**) and V<sub>20</sub>-RuO/TiO<sub>x</sub> (**g,h**), respectively. (The gray, blue and red balls represent Ru, Ti and O atoms, respectively).

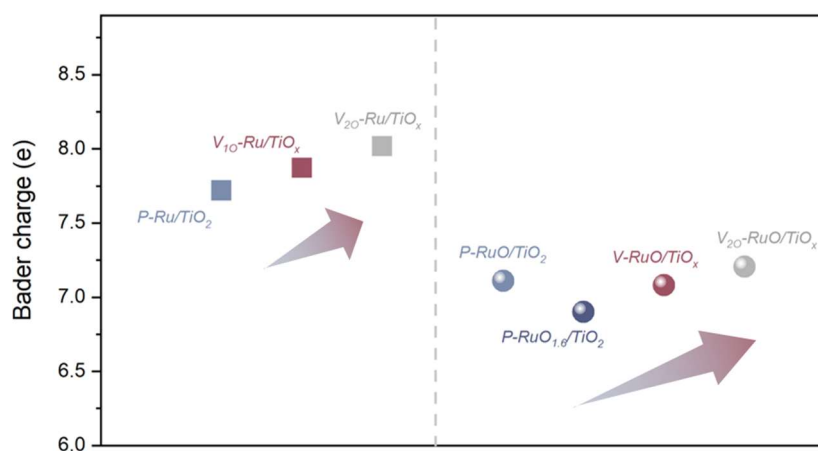

**Supplementary Figure 41. Bader charge of interfacial Ru atom for different structures.**

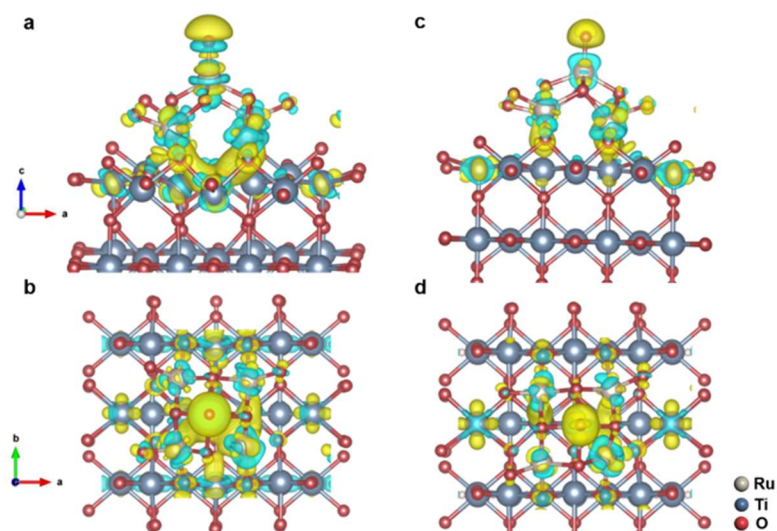

**Supplementary Figure 42.** Side view and top view of the differential charge density of V<sub>10</sub>-RuO/TiO<sub>x</sub> (**a,b**) and P-RuO<sub>1.6</sub>/TiO<sub>2</sub> (**c,d**). Electron accumulation and depletion are shown in cyan and yellow, respectively. (isovalue is 0.01|e|/Bohr<sup>3</sup>).

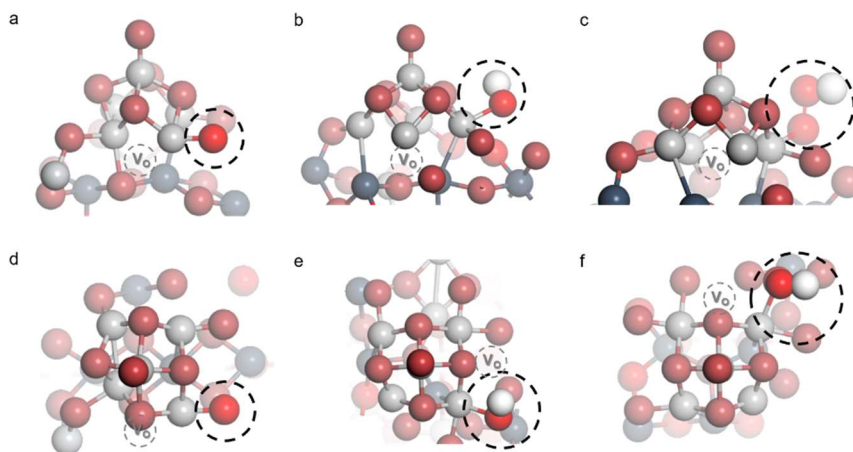

**Supplementary Figure 43.** Atomic structures of V<sub>10</sub>-RuO/TiO<sub>x</sub> with adsorbed OER intermediates. Side view (**a-c**) and top view (**d-f**) of V<sub>10</sub>-RuO/TiO<sub>x</sub> with adsorbed intermediate \*O (**a,d**), \*OH (**b,e**), and \*OOH (**c,f**) on the interfacial Ru site.



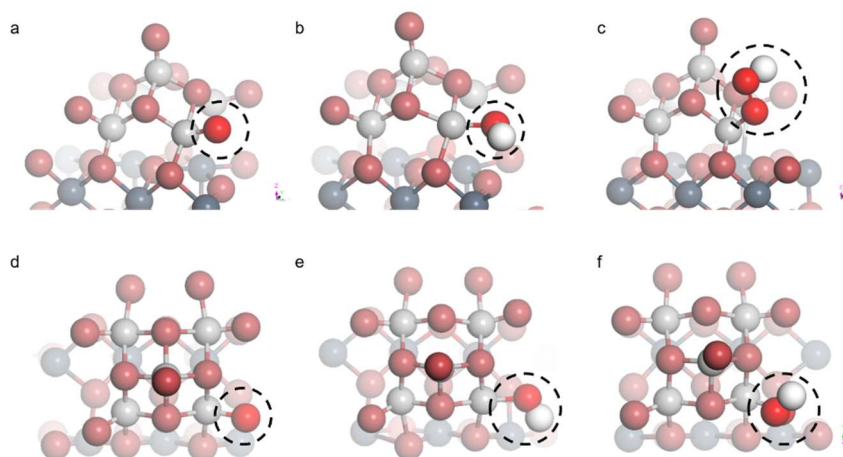

**Supplementary Figure 44.** Atomic structures of P-RuO<sub>1.6</sub>/TiO<sub>2</sub> with adsorbed OER intermediates. Side view (**a-c**) and top view (**d-f**) of P-RuO<sub>1.6</sub>/TiO<sub>2</sub> with adsorbed intermediate \*O (**a,d**), \*OH (**b,e**), and \*OOH (**c,f**) on the interfacial Ru site.

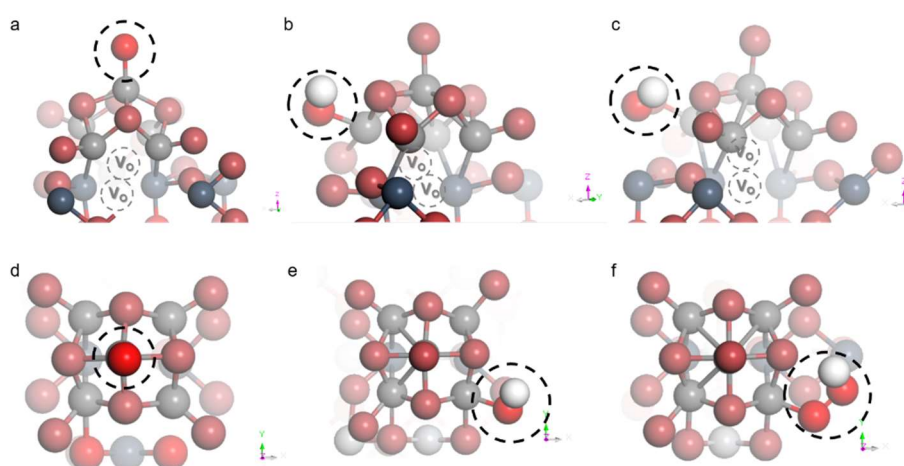

**Supplementary Figure 45.** Atomic structures of V<sub>2O</sub>-RuO/TiO<sub>x</sub> with adsorbed OER intermediates. Side view (**a-c**) and top view (**d-f**) of V<sub>2O</sub>-RuO/TiO<sub>x</sub> with adsorbed intermediate \*O (**a,d**), \*OH (**b,e**), and \*OOH (**c,f**) on the interfacial Ru site.

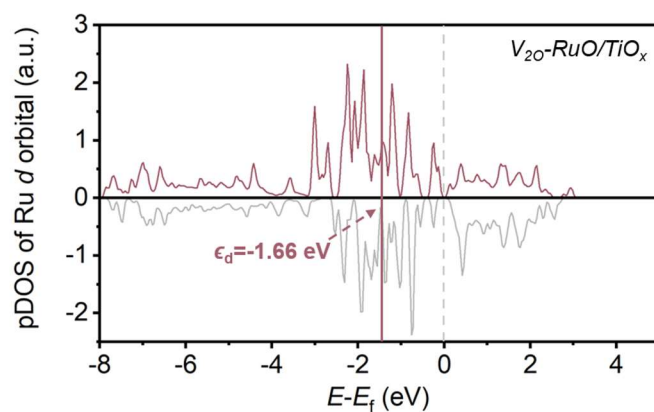

**Supplementary Figure 46.** Projected density of states (PDOS) and band center of Ru d-state for  $V_{20}$ -RuO/TiO<sub>x</sub>.

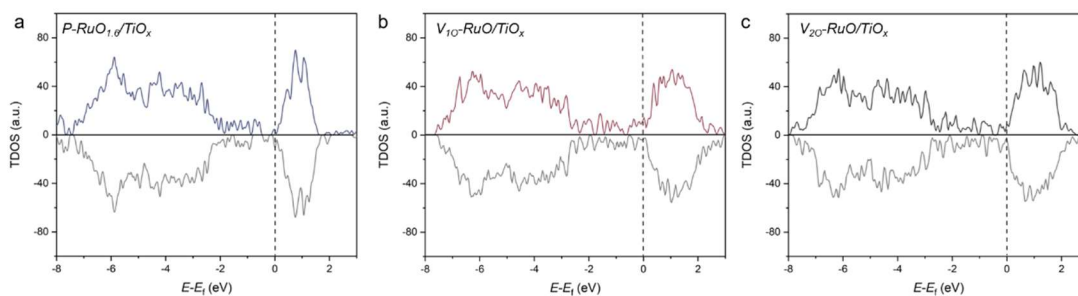

**Supplementary Figure 47.** Total density of states (TDOS) for P-RuO<sub>1.6</sub>/TiO<sub>2</sub> (a),  $V_{10}$ -RuO/TiO<sub>x</sub> (b) and  $V_{20}$ -RuO/TiO<sub>x</sub> (c).

**Supplementary Table 1.** Summary of electrocatalytic OER performance of the Ru/TiO<sub>x</sub> catalysts and state-of-the-art electrocatalysts in acidic media.

| Samples                                                                | Electrolyte                           | $\eta_{10}$ | Stability                                                        | Reference                                                             |
|------------------------------------------------------------------------|---------------------------------------|-------------|------------------------------------------------------------------|-----------------------------------------------------------------------|
| Ru/TiO <sub>x</sub>                                                    | 0.5 M H <sub>2</sub> SO <sub>4</sub>  | 174         | 900h @ 10 mA cm <sup>-2</sup> ;<br>50h @ 100 mA cm <sup>-2</sup> | This work                                                             |
| RuO <sub>2</sub> /TiO <sub>2</sub>                                     | 0.5 M H <sub>2</sub> SO <sub>4</sub>  | 208         | <1h @ 100 mA cm <sup>-2</sup>                                    | This work                                                             |
| IrO <sub>2</sub> /TiO <sub>2</sub>                                     | 0.5 M H <sub>2</sub> SO <sub>4</sub>  | 236         | <10h @ 100 mA cm <sup>-2</sup>                                   | This work                                                             |
| Ni-RuO <sub>2</sub>                                                    | 0.1 M HClO <sub>4</sub>               | 214         | 200h @ 10 mA cm <sup>-2</sup>                                    | <sup>1</sup> <i>Nat. Mater.</i> <b>22</b> , 100 (2023)                |
| Ru@V-RuO <sub>2</sub> /C                                               | 0.5 M H <sub>2</sub> SO <sub>4</sub>  | 176         | 25h @ 10 mA cm <sup>-2</sup>                                     | <sup>2</sup> <i>Adv. Mater.</i> <b>35</b> , 2206351 (2023)            |
| C-RuO <sub>2</sub> -RuSe                                               | 0.5 M H <sub>2</sub> SO <sub>4</sub>  | 212         | 50h @ 20 mA cm <sup>-2</sup><br>50h @ 50 mA cm <sup>-2</sup>     | <sup>3</sup> <i>Chem</i> <b>8</b> , 1-15 (2022)                       |
| Ru/Co-N-C                                                              | 0.5 M H <sub>2</sub> SO <sub>4</sub>  | 232         | 20h @ 10 mA cm <sup>-2</sup>                                     | <sup>4</sup> <i>Adv. Mater.</i> <b>34</b> , 2110103 (2022)            |
| PtCo-RuO <sub>2</sub> /C                                               | 0.1 M HClO <sub>4</sub>               | 212.6       | 20h @ 10 mA cm <sup>-2</sup>                                     | <sup>5</sup> <i>Energy Environ. Sci.</i> <b>15</b> , 1119 (2022)      |
| Ta <sub>0.1</sub> Tm <sub>0.1</sub> Ir <sub>0.8</sub> O <sub>2-δ</sub> | 0.5 M H <sub>2</sub> SO <sub>4</sub>  | 226         | 500h @ 10 mA cm <sup>-2</sup>                                    | <sup>6</sup> <i>Nat. Nanotech.</i> <b>16</b> , 1371 (2021)            |
| 3R-IrO <sub>2</sub>                                                    | 0.1 M HClO <sub>4</sub>               | 188         | 511h @ 10 mA cm <sup>-2</sup>                                    | <sup>7</sup> <i>Joule</i> <b>5</b> , 3221 (2021)                      |
| Ir-MnO <sub>2</sub>                                                    | 0.5 M H <sub>2</sub> SO <sub>4</sub>  | 218         | 650h @ 10 mA cm <sup>-2</sup>                                    | <sup>8</sup> <i>Joule</i> <b>5</b> , 2164 (2021)                      |
| E-Ru/Fe ONAs/C                                                         | 0.5 M H <sub>2</sub> SO <sub>4</sub>  | 238         | 9h @ 5 mA cm <sup>-2</sup>                                       | <sup>9</sup> <i>Nano Energy</i> <b>84</b> , 105909 (2021)             |
| IrO <sub>x</sub> /9R-BaIrO <sub>3</sub>                                | 0.5 M H <sub>2</sub> SO <sub>4</sub>  | 230         | 48h @ 10 mA cm <sup>-2</sup>                                     | <sup>10</sup> <i>J. Am. Chem. Soc.</i> <b>143</b> , 18001 (2021)      |
| S-RuFeO <sub>x</sub>                                                   | 0.1 M HClO <sub>4</sub>               | 187         | 50h @ 1 mA cm <sup>-2</sup>                                      | <sup>11</sup> <i>Adv. Funct. Mater.</i> <b>31</b> , 2101405 (2021)    |
| Ru/RuS <sub>2</sub>                                                    | 0.5 M H <sub>2</sub> SO <sub>4</sub>  | 201         | 24h @ 10 mA cm <sup>-2</sup>                                     | <sup>12</sup> <i>Angew. Chem., Int. Ed.</i> <b>133</b> , 12436 (2021) |
| RuNi <sub>2</sub> @G                                                   | 0.5 M H <sub>2</sub> SO <sub>4</sub>  | 227         | 24h @ 10 mA cm <sup>-2</sup>                                     | <sup>13</sup> <i>Adv. Mater.</i> <b>32</b> , 1908126 (2020)           |
| Ir-NiCo <sub>2</sub> O <sub>4</sub>                                    | 0.5 M H <sub>2</sub> SO <sub>4</sub>  | 240         | 70h @ 10 mA cm <sup>-2</sup>                                     | <sup>14</sup> <i>J. Am. Chem. Soc.</i> <b>142</b> , 18378 (2020)      |
| Ru <sub>1</sub> -Pt <sub>3</sub> Cu                                    | 0.1 M HClO <sub>4</sub>               | 280         | 28h @ 10 mA cm <sup>-2</sup>                                     | <sup>15</sup> <i>Nat. Catal.</i> <b>2</b> , 304-313 (2019)            |
| Ru@IrO <sub>x</sub>                                                    | 0.05 M H <sub>2</sub> SO <sub>4</sub> | 282         | 24h @ 1.55 V<br>vs.RHE                                           | <sup>16</sup> <i>Chem</i> <b>5</b> , 445-459 (2019)                   |
| Cr <sub>0.6</sub> Ru <sub>0.4</sub> O <sub>2</sub>                     | 0.5 M H <sub>2</sub> SO <sub>4</sub>  | 178         | 10h @ 10 mA cm <sup>-2</sup>                                     | <sup>17</sup> <i>Nat. Commun.</i> <b>10</b> , 162 (2019)              |
| RuCu nanosheets                                                        | 0.5 M H <sub>2</sub> SO <sub>4</sub>  | 236         | 13.5h @ 5 mA cm <sup>-2</sup>                                    | <sup>18</sup> <i>Angew. Chem. Int. Ed.</i> <b>58</b> , 13983 (2019)   |
| IrCo@IrO <sub>x-n</sub> NDs                                            | 0.5 M H <sub>2</sub> SO <sub>4</sub>  | 247         | 10h @ 10 mA cm <sup>-2</sup>                                     | <sup>19</sup> <i>Adv. Mater.</i> <b>31</b> , 1903616 (2019)           |
| Ir-based nanocages                                                     | 0.5 M H <sub>2</sub> SO <sub>4</sub>  | 226         | 15h @ 10 mA cm <sup>-2</sup>                                     | <sup>20</sup> <i>Angew. Chem. Int. Ed.</i> <b>58</b> , 7244 (2019)    |



**Supplementary Table 2.** The mass loading ( $\text{mg cm}^{-2}$ ) and weight percent ( $\text{wt}\%$ ) of noble metal in different samples (by ICP-MS measurement and EDS) and atomic percent ( $\text{at}\%$ ) by XPS measurement.

| Noble metal in sample                                 | Mass loading<br>( $\text{mg cm}^{-2}$ ) | Weight %<br>( $\text{wt}\%$ ) (ICP) | Weight %<br>( $\text{wt}\%$ ) (EDS) | Atomic %<br>( $\text{at}\%$ ) (XPS) |
|-------------------------------------------------------|-----------------------------------------|-------------------------------------|-------------------------------------|-------------------------------------|
| Ru/TiO <sub>x</sub>                                   | 0.0715                                  | 0.075                               | 7.7%                                | 9.3%                                |
| Annealed RuO <sub>x</sub> /TiO <sub>2</sub>           | 0.0867                                  | 0.083                               | 8.2%                                | 9.2%                                |
| Com. RuO <sub>2</sub> /TiO <sub>2</sub>               | 0.0992                                  | 0.092                               | -                                   | 10.1%                               |
| Com. IrO <sub>2</sub> /TiO <sub>2</sub>               | 0.1135                                  | 0.107                               | 8.8%                                | 7.5%                                |
| Ru/TiO <sub>x</sub> after OER                         | 0.0695                                  | 0.073                               | 6.4%                                | 7.2%                                |
| Annealed RuO <sub>x</sub> /TiO <sub>2</sub> after OER | 0.0367                                  | 0.035                               | 3.3%                                | 4.3%                                |
| Com. RuO <sub>2</sub> /TiO <sub>2</sub> after OER     | 0.0201                                  | 0.019                               | -                                   | 2.4%                                |

\*Note: Since the catalysts are binder-free electrodes, the catalysts are dissolved together with the substrates during the ICP test, while EDS and XPS only detect the surface content, so the  $\text{wt}\%$  obtained through ICP is less than that obtained through EDS and XPS, but the trend is consistent.

**Supplementary Table 3.** OER mass activity comparison between the as-synthesized Ru/TiO<sub>x</sub> catalyst and other reported noble metal-based electrocatalysts in acidic media.

| Catalysts                                                 | Electrolyte                           | Potential<br>(V vs. RHE) | Mass activity<br>(A g <sub>noble metal</sub> <sup>-1</sup> ) | Reference                                                              |
|-----------------------------------------------------------|---------------------------------------|--------------------------|--------------------------------------------------------------|------------------------------------------------------------------------|
| Ru/TiO <sub>x</sub>                                       | 0.5 M H <sub>2</sub> SO <sub>4</sub>  | 1.45                     | 2128.2                                                       | This work                                                              |
|                                                           |                                       | 1.5                      | 5876.4                                                       |                                                                        |
| Com. RuO <sub>2</sub> /TiO <sub>2</sub>                   | 0.5 M H <sub>2</sub> SO <sub>4</sub>  | 1.45                     | 462.0                                                        | This work                                                              |
|                                                           |                                       | 1.5                      | 1062.9                                                       |                                                                        |
| Com. IrO <sub>2</sub> /TiO <sub>2</sub>                   | 0.5 M H <sub>2</sub> SO <sub>4</sub>  | 1.45                     | 46.0                                                         | This work                                                              |
|                                                           |                                       | 1.5                      | 191.7                                                        |                                                                        |
| Dealloyed nanoporous IrNi                                 | 0.5 M H <sub>2</sub> SO <sub>4</sub>  | 1.5                      | 52.5                                                         | <sup>21</sup> <i>Energy Environ. Sci.</i> <b>15</b> , 3449-3461 (2022) |
| Ir-MnO <sub>2</sub>                                       | 0.5 M H <sub>2</sub> SO <sub>4</sub>  | 1.53                     | 766.0                                                        | <sup>8</sup> <i>Joule</i> <b>8</b> , 1-8 (2021)                        |
| Ru/MnO <sub>2</sub>                                       | 0.1 M HClO <sub>4</sub>               | 1.40                     | 1264.0                                                       | <sup>22</sup> <i>Nat. Catal.</i> <b>4</b> , 1012-1023 (2021)           |
| RuIr nanosized-coral                                      | 0.05 M H <sub>2</sub> SO <sub>4</sub> | 1.45                     | 796.0                                                        | <sup>23</sup> <i>Nat Commun.</i> <b>12</b> , 1145 (2021)               |
| RuIr@carbon support                                       | 0.5 M H <sub>2</sub> SO <sub>4</sub>  | 1.53                     | 2041.0                                                       | <sup>24</sup> <i>ACS Catal.</i> <b>11</b> , 3402-3413 (2021)           |
| IrCuNi deeply concave nanocubes/C                         | 0.1 M HClO <sub>4</sub>               | 1.53                     | 6600.0                                                       | <sup>25</sup> <i>Nano Lett.</i> <b>21</b> , 2809-2816 (2021)           |
| Ru@Ir-O                                                   | 0.5 M H <sub>2</sub> SO <sub>4</sub>  | 1.55                     | 1169.0                                                       | <sup>26</sup> <i>Small</i> <b>18</b> , 2108031 (2022)                  |
| S-RuFeO <sub>x</sub>                                      | 0.1 M HClO <sub>4</sub>               | 1.42                     | 1180.0                                                       | <sup>11</sup> <i>Adv. Funct. Mater.</i> <b>31</b> , 2101405 (2021)     |
| RuO <sub>2</sub> /(Co,Mn) <sub>3</sub> O <sub>4</sub> /CC | 0.5 M H <sub>2</sub> SO <sub>4</sub>  | 1.53                     | 366.5                                                        | <sup>27</sup> <i>Appl. Catal., B</i> <b>31</b> , 2101405 (2021)        |
| Ir-Ta NPs                                                 | 0.1 M HClO <sub>4</sub>               | 1.55                     | 650±150                                                      | <sup>28</sup> <i>Nat. Energy</i> <b>7</b> , 55-64 (2022)               |
| Atomically dispersed hetero-nitrogen Ir                   | 0.5 M H <sub>2</sub> SO <sub>4</sub>  | 1.45                     | 2860.0                                                       | <sup>29</sup> <i>Nat. Commun.</i> , <b>12</b> , 6118 (2021)            |
| RuO <sub>2</sub> -nanosheets/carbon fiber                 | 0.5 M H <sub>2</sub> SO <sub>4</sub>  | 1.53                     | 115.5                                                        | <sup>30</sup> <i>Nano Energy</i> <b>88</b> , 106276 (2021)             |
| Ni-Ru@RuO <sub>x</sub>                                    | 0.5 M H <sub>2</sub> SO <sub>4</sub>  | 1.45                     | 315.0                                                        | <sup>31</sup> <i>Adv. Energy Mater.</i> <b>11</b> , 2003448 (2021)     |
| PdCu/Ir/C                                                 | 0.1 M HClO <sub>4</sub>               | 1.51                     | 1190                                                         | <sup>32</sup> <i>Angew</i> <b>60</b> , 8243-8250 (2021)                |

**Supplementary Table 4.** TOF of Ru/TiO<sub>x</sub> with previously reported OER catalysts in acid.

| Catalysts                                              | Electrolyte                          | Overpotential (mV) | TOF (s <sup>-1</sup> ) | Reference                                                                 |
|--------------------------------------------------------|--------------------------------------|--------------------|------------------------|---------------------------------------------------------------------------|
| Ru/TiO <sub>x</sub>                                    | 0.5 M H <sub>2</sub> SO <sub>4</sub> | 270                | 1.707                  | This work                                                                 |
|                                                        |                                      | 300                | 1.960                  |                                                                           |
| Annealed RuO <sub>x</sub> /TiO <sub>2</sub>            | 0.5 M H <sub>2</sub> SO <sub>4</sub> | 300                | 0.820                  | This work                                                                 |
| Com. RuO <sub>2</sub>                                  | 0.5 M H <sub>2</sub> SO <sub>4</sub> | 300                | 0.322                  | This work                                                                 |
| SnRuO <sub>x</sub>                                     | 0.5 M H <sub>2</sub> SO <sub>4</sub> | 250                | 0.63                   | <sup>33</sup> <i>Nat. Commun.</i> <b>14</b> , 843 (2023)                  |
| Rh-RuO <sub>2</sub> /Graphene                          | 0.5 M H <sub>2</sub> SO <sub>4</sub> | 300                | 1.74                   | <sup>34</sup> <i>Nat. Commun.</i> <b>14</b> , 1412 (2023)                 |
| high-loading Ir single atoms with <i>d</i> -band holes | 0.1 M HClO <sub>4</sub>              | 216                | 0.599                  | <sup>53</sup> <i>Angew. Chem., Int. Ed.</i> <b>135</b> , 202308082 (2023) |
| Ru <sub>5</sub> W <sub>1</sub> O <sub>x</sub>          | 0.5 M H <sub>2</sub> SO <sub>4</sub> | 300                | 0.163                  | <sup>36</sup> <i>Nat. Commun.</i> <b>13</b> , 4871 (2022)                 |
| Cr-SrIrO <sub>3</sub>                                  | 0.1 M HClO <sub>4</sub>              | 300                | 0.208                  | <sup>37</sup> <i>Nano Energy</i> <b>102</b> , 107680 (2022)               |
| Ru/MnO <sub>2</sub>                                    | 0.1 M HClO <sub>4</sub>              | 165                | 0.331                  | <sup>38</sup> <i>Nat. Catal.</i> <b>4</b> , 1012-1023 (2021)              |
| Ru <sub>1</sub> Ir <sub>1</sub> O <sub>x</sub>         | 0.5 M H <sub>2</sub> SO <sub>4</sub> | 300                | 0.47                   | <sup>39</sup> <i>Adv. Energy Mater.</i> <b>11</b> , 2102883 (2021)        |

**Supplementary Table 5.** TOF of catalysts using different normalization methods.

| Catalysts                                   | Overpotential (mV) | Bulk TOF (s <sup>-1</sup> ) | ECSA TOF (s <sup>-1</sup> ) |
|---------------------------------------------|--------------------|-----------------------------|-----------------------------|
| Ru/TiO <sub>x</sub>                         | 270                | 1.707                       | 1.835                       |
|                                             | 300                | 1.960                       | 2.192                       |
| Annealed RuO <sub>x</sub> /TiO <sub>2</sub> | 300                | 0.820                       | 1.640                       |
| Com. RuO <sub>2</sub>                       | 300                | 0.322                       | 1.520                       |

**Supplementary Table 6.** Comparison of the PEM electrolyzer performance with those previously reported.

| Anode catalysts                                                       | Cell voltage (V)                  | Stability                         | Reference                                                          |
|-----------------------------------------------------------------------|-----------------------------------|-----------------------------------|--------------------------------------------------------------------|
| Ru/TiO <sub>x</sub>                                                   | 1.71 V @ 1 A cm <sup>-2</sup>     | 0.5 A cm <sup>-2</sup> for 200 h  | This work                                                          |
| RuO <sub>2</sub>                                                      | 1.94 V @ 1 A cm <sup>-2</sup>     | 0.5 A cm <sup>-2</sup> for < 50 h | This work                                                          |
| Nb <sub>0.1</sub> Ru <sub>0.9</sub> O <sub>2</sub>                    | 1.69 V @ 1 A cm <sup>-2</sup>     | 0.3 A cm <sup>-2</sup> for 100 h  | <sup>40</sup> <i>Joule</i> <b>7</b> , 558-573 (2023)               |
| Y <sub>2</sub> MnRuO <sub>7</sub>                                     | 1.51 V @ 0.2 A cm <sup>-2</sup>   | 0.2 A cm <sup>-2</sup> for 24 h   | <sup>41</sup> <i>Nat. Commun.</i> <b>14</b> , 2010 (2023)          |
| Nd <sub>0.1</sub> RuO <sub>x</sub>                                    | 1.595 V @ 0.05 A cm <sup>-2</sup> | 0.05 A cm <sup>-2</sup> for 50 h  | <sup>42</sup> <i>Adv. Funct. Mater.</i> <b>33</b> , 2213304 (2023) |
| IrO <sub>x</sub> /Zr <sub>2</sub> ON <sub>2</sub>                     | 1.927 V at 2.0 A cm <sup>-2</sup> | 1.0 A cm <sup>-2</sup> for 50 h   | <sup>43</sup> <i>Adv. Funct. Mater.</i> <b>33</b> , 2301557 (2023) |
| RuO <sub>2</sub> /Defect-TiO <sub>2</sub>                             | 1.74 V @ 1.5 A cm <sup>-2</sup>   | 1.0 A cm <sup>-2</sup> for 6 h    | <sup>44</sup> <i>ACS Catal.</i> <b>12</b> , 9437-9445 (2022)       |
| Strained-RuO <sub>2</sub> /ATO                                        | 1.51 V @ 1 A cm <sup>-2</sup>     | 0.5 A cm <sup>-2</sup> for 40 h   | <sup>45</sup> <i>Adv. Sci.</i> <b>9</b> , 2201654 (2022)           |
| W <sub>0.2</sub> Er <sub>0.1</sub> Ru <sub>0.7</sub> O <sub>2-δ</sub> | -                                 | 0.1 A cm <sup>-2</sup> for 120 h  | <sup>46</sup> <i>Nat. Commun.</i> <b>11</b> , 5368 (2020)          |

**Supplementary Table 7.** Concentrations of the major constituents in natural seawater.

| Species                       | Concentration (ppm) |
|-------------------------------|---------------------|
| Cl <sup>-</sup>               | 19350               |
| Na <sup>+</sup>               | 9685                |
| SO <sub>4</sub> <sup>2-</sup> | 2410                |
| Mg <sup>2+</sup>              | 870                 |
| Ca <sup>2+</sup>              | 344                 |

**Supplementary Table 8.** High resolution Ru 3*d* XPS peak fitting parameters of different samples before and after OER.

| Sample                                                | Core level                   | Peak position (eV) | Peak area | FWHM (eV) <sup>a)</sup> |
|-------------------------------------------------------|------------------------------|--------------------|-----------|-------------------------|
| Ru/TiO <sub>x</sub>                                   | Ru 3 <i>d</i> <sub>5/2</sub> | 280.6              | 34594.87  | 0.68                    |
|                                                       |                              | 281.16             | 25185.03  | 1.57                    |
|                                                       | Ru 3 <i>d</i> <sub>3/2</sub> | 284.7              | 23063.65  | 0.93                    |
|                                                       |                              | 285.25             | 16790.02  | 1.81                    |
|                                                       |                              | 284.8              | 27369.31  | 1.81                    |
| Annealed RuO <sub>x</sub> /TiO <sub>2</sub>           | Ru 3 <i>d</i> <sub>5/2</sub> | 280.62             | 67103.88  | 0.98                    |
|                                                       |                              | 282.33             | 55862.16  | 1.78                    |
|                                                       | Ru 3 <i>d</i> <sub>3/2</sub> | 284.72             | 44735.92  | 0.98                    |
|                                                       |                              | 286.43             | 37241.44  | 1.82                    |
|                                                       |                              | 284.8              | 34397.01  | 1.77                    |
| Com. RuO <sub>2</sub> /TiO <sub>2</sub>               | Ru 3 <i>d</i> <sub>5/2</sub> | 280.65             | 14552.20  | 0.92                    |
|                                                       |                              | 282.43             | 15022.85  | 1.82                    |
|                                                       | Ru 3 <i>d</i> <sub>3/2</sub> | 284.75             | 9701.47   | 1.02                    |
|                                                       |                              | 286.53             | 10015.23  | 1.85                    |
|                                                       |                              | 284.8              | 6377.99   | 1.91                    |
| Ru/TiO <sub>x</sub> after OER                         | Ru 3 <i>d</i> <sub>5/2</sub> | 280.61             | 21619.56  | 1.41                    |
|                                                       |                              | 282.33             | 15987.43  | 1.91                    |
|                                                       | Ru 3 <i>d</i> <sub>3/2</sub> | 284.72             | 14413.04  | 1.58                    |
|                                                       |                              | 286.44             | 10658.29  | 1.9                     |
|                                                       |                              | 284.8              | 9130.65   | 1.98                    |
| Annealed RuO <sub>x</sub> /TiO <sub>2</sub> after OER | Ru 3 <i>d</i> <sub>5/2</sub> | 281.16             | 14047.01  | 0.95                    |
|                                                       |                              | 282.38             | 15072.05  | 1.81                    |
|                                                       | Ru 3 <i>d</i> <sub>3/2</sub> | 285.26             | 9364.67   | 1.05                    |
|                                                       |                              | 286.48             | 10048.03  | 1.89                    |
|                                                       |                              | 284.8              | 28387.34  | 1.5                     |
| Com. RuO <sub>2</sub> /TiO <sub>2</sub> after OER     | Ru 3 <i>d</i> <sub>5/2</sub> | 281.55             | 12506.05  | 1.23                    |
|                                                       |                              | 282.71             | 16144.38  | 1.47                    |
|                                                       | Ru 3 <i>d</i> <sub>3/2</sub> | 285.65             | 8337.36   | 1.26                    |
|                                                       |                              | 286.8              | 10762.92  | 1.65                    |
|                                                       |                              | 284.8              | 56728.58  | 1.27                    |

<sup>a)</sup> FWHM: full-width at the half of the maximum.

**Supplementary Table 9.** High resolution Ru 3*d*, Ti 2*p* and O 1*s* XPS peak fitting parameters of Ru/TiO<sub>x</sub> at applied potential during 1.0-1.7 V vs. RHE.

| Sample                       | Core level                   | Peak position (eV)           | Peak area | FWHM (eV) <sup>a)</sup> |      |
|------------------------------|------------------------------|------------------------------|-----------|-------------------------|------|
| Ru/TiO <sub>x</sub> -1.0     | Ru 3 <i>d</i> <sub>5/2</sub> | 280.12                       | 2593.16   | 1.07                    |      |
|                              |                              | 280.77                       | 1836.78   | 1.17                    |      |
|                              | Ru 3 <i>d</i> <sub>3/2</sub> | 284.22                       | 1728.77   | 1.11                    |      |
|                              |                              | 284.87                       | 1224.52   | 1.19                    |      |
|                              | Ti 2 <i>p</i> <sub>3/2</sub> | 457.90                       | 7399.48   | 1.20                    |      |
|                              |                              | 458.51                       | 23726.30  | 1.14                    |      |
|                              | Ti 2 <i>p</i> <sub>1/2</sub> | 463.90                       | 3699.74   | 1.21                    |      |
|                              |                              | 464.51                       | 11863.15  | 1.54                    |      |
|                              | Ru 3 <i>p</i> <sub>3/2</sub> | 460.60                       | 1470.22   | 1.90                    |      |
|                              |                              | 462.96                       | 2533.76   | 1.48                    |      |
|                              | O 1 <i>s</i>                 | 529.52                       | 19079.02  | 1.88                    |      |
|                              |                              | 530.45                       | 9727.79   | 1.45                    |      |
|                              | Ru/TiO <sub>x</sub> -1.2     | Ru 3 <i>d</i> <sub>5/2</sub> | 280.13    | 2734.80                 | 1.05 |
|                              |                              |                              | 280.81    | 1969.02                 | 1.20 |
| Ru 3 <i>d</i> <sub>3/2</sub> |                              | 284.23                       | 1823.20   | 1.07                    |      |
|                              |                              | 284.91                       | 1312.68   | 1.21                    |      |
| Ti 2 <i>p</i> <sub>3/2</sub> |                              | 457.90                       | 7001.99   | 1.23                    |      |
|                              |                              | 458.58                       | 22629.02  | 1.09                    |      |
| Ti 2 <i>p</i> <sub>1/2</sub> |                              | 463.90                       | 3500.99   | 1.23                    |      |
|                              |                              | 464.50                       | 11314.51  | 1.49                    |      |
| Ru 3 <i>p</i> <sub>3/2</sub> |                              | 460.60                       | 1591.89   | 1.89                    |      |
|                              |                              | 462.95                       | 2534.37   | 1.68                    |      |
| O 1 <i>s</i>                 |                              | 529.55                       | 19282.80  | 1.86                    |      |
|                              |                              | 530.40                       | 9066.99   | 1.51                    |      |
| Ru/TiO <sub>x</sub> -1.4     |                              | Ru 3 <i>d</i> <sub>5/2</sub> | 280.15    | 2678.28                 | 1.07 |
|                              |                              |                              | 280.83    | 1945.85                 | 1.44 |
|                              | Ru 3 <i>d</i> <sub>3/2</sub> | 284.25                       | 1785.52   | 1.08                    |      |
|                              |                              | 284.93                       | 1297.23   | 1.45                    |      |
|                              | Ti 2 <i>p</i> <sub>3/2</sub> | 457.90                       | 3294.47   | 1.16                    |      |
|                              |                              | 458.54                       | 15788.83  | 1.14                    |      |
|                              | Ti 2 <i>p</i> <sub>1/2</sub> | 463.90                       | 1647.24   | 1.16                    |      |

|                          |                      |        |          |      |
|--------------------------|----------------------|--------|----------|------|
|                          |                      | 464.54 | 7894.42  | 1.54 |
|                          | Ru 3p <sub>3/2</sub> | 460.90 | 1172.22  | 1.98 |
|                          |                      | 463.08 | 1976.27  | 1.67 |
|                          |                      | 529.60 | 20864.25 | 1.72 |
|                          | O 1s                 | 530.48 | 9731.28  | 1.41 |
|                          |                      | 531.49 | 8407.48  | 1.98 |
| Ru/TiO <sub>x</sub> -1.6 | Ru 3d <sub>5/2</sub> | 280.17 | 2435.83  | 1.03 |
|                          |                      | 280.95 | 1688.01  | 1.37 |
|                          |                      | 284.27 | 1557.22  | 1.05 |
|                          | Ru 3d <sub>3/2</sub> | 285.05 | 1218.68  | 1.37 |
|                          |                      | 457.90 | 5249.07  | 0.98 |
|                          | Ti 2p <sub>3/2</sub> | 458.60 | 29718.37 | 1.10 |
|                          |                      | 463.90 | 2624.53  | 0.98 |
|                          |                      | 464.60 | 14859.18 | 1.50 |
|                          |                      | 460.40 | 2316.29  | 1.92 |
|                          | Ru 3p <sub>3/2</sub> | 463.15 | 3039.33  | 1.52 |
|                          |                      | 529.67 | 21524.80 | 1.63 |
|                          | O 1s                 | 530.48 | 9988.22  | 1.38 |
|                          |                      | 531.52 | 7457.96  | 1.89 |
| Ru/TiO <sub>x</sub> -1.7 | Ru 3d <sub>5/2</sub> | 280.21 | 2506.04  | 1.04 |
|                          |                      | 281.00 | 1826.04  | 1.35 |
|                          |                      | 284.31 | 1670.69  | 1.04 |
|                          | Ru 3d <sub>3/2</sub> | 285.10 | 1217.36  | 1.35 |
|                          |                      | 457.90 | 5156.78  | 1.12 |
|                          | Ti 2p <sub>3/2</sub> | 458.63 | 29558.12 | 1.07 |
|                          |                      | 463.90 | 2578.39  | 1.12 |
|                          |                      | 464.63 | 14779.06 | 1.47 |
|                          |                      | 460.60 | 2411.36  | 1.98 |
|                          | Ru 3p <sub>3/2</sub> | 463.27 | 3225.89  | 1.89 |
|                          |                      | 526.69 | 23711.47 | 1.56 |
|                          | O 1s                 | 530.46 | 11822.26 | 1.27 |
|                          |                      | 531.50 | 8267.88  | 2.03 |

<sup>a</sup>)FWHM: full-width at the half of the maximum.



**Supplementary Table 10.** Summary of Ru *K*-edge adsorption energy ( $E_0$ ) and valence states for Ru foil, RuO<sub>2</sub>, Ru/TiO<sub>x</sub> before and after OER.

| Sample                        | Ru <i>K</i> -edge Energy (eV) | Ru Valence State |
|-------------------------------|-------------------------------|------------------|
| Ru foil                       | 22115.01                      | 0                |
| Ru/TiO <sub>x</sub>           | 22116.21                      | +0.34            |
| Ru/TiO <sub>x</sub> after OER | 22117.36                      | +0.72            |
| RuO <sub>2</sub>              | 22127.98                      | 4                |

**Supplementary Table 11.** Structural parameters obtained from the curve-fitting analysis of the Ru *K*-edge EXAFS spectra.

| Sample                        | Path  | $N^a$ | $R$ (Å) <sup>b</sup> | $\sigma^2$ ( $10^{-3}\text{Å}^2$ ) <sup>c</sup> | $\Delta E_0$ (eV) <sup>d</sup> | $R$ -factor <sup>e</sup> |
|-------------------------------|-------|-------|----------------------|-------------------------------------------------|--------------------------------|--------------------------|
| Ru foil                       | Ru-Ru | 12    | 2.67 ± 0.01          | 3.10 ± 0.2                                      | -5.80 ± 0.7                    | 0.010                    |
| RuO <sub>2</sub>              | Ru-Ru | 2     | 3.14 ± 0.01          | 0.80 ± 0.4                                      | -3.60 ± 0.8                    | 0.011                    |
|                               | Ru-O  | 6     | 1.97 ± 0.01          | 3.30 ± 0.3                                      | -3.60 ± 0.8                    |                          |
| Ru/TiO <sub>x</sub>           | Ru-Ru | 7.8   | 2.66 ± 0.01          | 3.56 ± 1.0                                      | -5.60 ± 0.6                    | 0.017                    |
|                               | Ru-O  | 1.8   | 2.05 ± 0.02          | 2.46 ± 0.8                                      | -6.10 ± 1.0                    |                          |
| Ru/TiO <sub>x</sub> after OER | Ru-Ru | 7.4   | 2.68 ± 0.01          | 3.55 ± 1.0                                      | -3.90 ± 1.0                    | 0.019                    |
|                               | Ru-O  | 2.0   | 2.02 ± 0.02          | 4.50 ± 0.8                                      | -5.70 ± 0.8                    |                          |

<sup>a</sup>)  $N$ : coordination number; <sup>b</sup>)  $R$ : bond distance; <sup>c</sup>)  $\sigma^2$ : Debye-Waller factor; <sup>d</sup>)  $\Delta E_0$ : inner potential correction; <sup>e</sup>)  $R$ -factor: goodness of fit.

**Supplementary Table 12.** Integrated COHP (ICOHP) value for adsorption \*O of Ru-O in different models.

| Model                                | -ICOHP |
|--------------------------------------|--------|
| P-RuO <sub>x</sub> /TiO <sub>2</sub> | -7.61  |
| V-RuO <sub>x</sub> /TiO <sub>x</sub> | -7.50  |

## Supplementary References

1. Wu, Z.-Y. et al. Non-iridium-based electrocatalyst for durable acidic oxygen evolution reaction in proton exchange membrane water electrolysis. *Nat. Mater.* **22**, 100-108 (2023).
2. Li, Y.-P. et al. Arming Ru with oxygen-vacancy-enriched RuO<sub>2</sub> sub-nanometer skin activates superior bifunctionality for pH-universal overall water splitting. *Adv. Mater.* **35**, 2206351 (2023).
3. Wang, J. et al. Exceptionally active and stable RuO<sub>2</sub> with interstitial carbon for water oxidation in acid. *Chem* **8**, 1673 (2022).
4. Rong, C.-L. et al. Electronic structure engineering of single-atom Ru Sites via Co-N<sub>4</sub> Sites for bifunctional pH-universal water splitting. *Adv. Mater.* **34**, 2110103 (2022).
5. Jin, H. et al. Safeguarding the RuO<sub>2</sub> phase against lattice oxygen oxidation during acidic water electrooxidation. *Energy Environ. Sci.* **15**, 1119-1130 (2022).
6. Wang, J. et al. Exceptionally active and stable RuO<sub>2</sub> with interstitial carbon for water oxidation in acid. *Chem* **8**, 1673 (2022).
7. Hao, S.-Y. et al. Torsion strained iridium oxide for efficient acidic water oxidation in proton exchange membrane electrolyzers. *Nat. Nanotech.* **16**, 1371-1377 (2021).
8. Fan, Z. L. et al. Extraordinary acidic oxygen evolution on new phase 3R-iridium oxide. *Joule* **5**, 3221-3234 (2021).
9. Shi, Z. P. et al. Confined Ir single sites with triggered lattice oxygen redox: toward boosted and sustained water oxidation catalysis. *Joule* **5**, 2164-2176 (2021).
10. Yao, Q., Huang B.-L., Xu, Y., Li, L.-G., Shao, Q. & Huang, X.-H. A chemical etching strategy to improve and stabilize RuO<sub>2</sub>-based nanoassemblies for acidic oxygen evolution. *Nano Energy* **84**, 105909 (2021).
11. Li, N. et al. Identification of the active-layer structures for acidic oxygen evolution from 9R-BaIrO<sub>3</sub> electrocatalyst with enhanced iridium mass activity. *J. Am. Chem. Soc.* **143**, 18001-18009 (2021).
12. Xue, Y.-R. et al. Sulfate-functionalized RuFeO<sub>x</sub> as highly efficient oxygen evolution reaction electrocatalyst in acid. *Adv. Funct. Mater.* **31**, 2101405 (2021).
13. Zhu, J.-W. et al. Regulative electronic states around ruthenium/ruthenium disulphide

- heterointerfaces for efficient water splitting in acidic media. *Angew. Chem., Int. Ed.* **133**, 12436-12442 (2021).
14. Cui, X.-J. et al. Robust interface Ru centers for high-performance acidic oxygen evolution. *Adv Mater.* **32**, 1908126 (2020).
  15. Yin, J. et al. Iridium single atoms coupling with oxygen vacancies boosts oxygen evolution reaction in acid media. *J. Am. Chem. Soc.* **142**, 18378-18386 (2020).
  16. Yao, Y.-C. et al. Engineering the electronic structure of single atom Ru sites via compressive strain boosts acidic water oxidation electrocatalysis. *Nat. Catal.* **2**, 304-313 (2019).
  17. Shan, J.-Q. et al. Charge-redistribution-enhanced nanocrystalline Ru@IrO<sub>x</sub> electrocatalysts for oxygen evolution in acidic media. *Chem* **5**, 445-459 (2019).
  18. Lin, Y. C. et al. Chromium-ruthenium oxide solid solution electrocatalyst for highly efficient oxygen evolution reaction in acidic media. *Nat. Commun.* **10**, 162 (2019).
  19. Yao, Q., Huang, B.-L., Zhang, N., Sun, M.-Z., Shao, Q. & Huang X.-Q. Channel-rich RuCu nanosheets for pH-universal overall water splitting electrocatalysis. *Angew. Chem., Int. Ed.* **58**, 13983-13988 (2019).
  20. Shan, J. Q., Ling, T., Davey, K., Zheng, Y. & Qiao, S.-Z. Transition-metal-doped RuIr bifunctional nanocrystals for overall water splitting in acidic environments. *Adv. Mater.* **31**, 1903616 (2019).
  21. Zhu, J. et al. Iridium-based cubic nanocages with 1.1-nm-thick walls: a highly efficient and durable electrocatalyst for water oxidation in an acidic medium. *Angew. Chem., Int. Ed.* **58**, 7244 (2019).
  22. Yeo, K.-R. et al. A highly active and stable 3D dandelion spore-structured self-supporting Ir-based electrocatalyst for proton exchange membrane water electrolysis fabricated using structural reconstruction. *Energy Environ. Sci.* **15**, 3449-3461 (2022).
  23. Lin, C. et al. In-situ reconstructed Ru atom array on  $\alpha$ -MnO<sub>2</sub> with enhanced performance for acidic water oxidation. *Nat. Catal.* **4**, 1012-1023 (2021).
  24. Wu, D.-S. et al. Efficient overall water splitting in acid with anisotropic metal nanosheets. *Nat Commun.* **12**, 1145 (2021).
  25. Xu, J.-Y. et al. Atomic-step enriched ruthenium-iridium nanocrystals anchored homogeneously on MOF-derived support for efficient and stable oxygen evolution in acidic

- and neutral media. *ACS Catal.* **11**, 3402-3413 (2021).
26. Liu, D. et al. IrCuNi deeply concave nanocubes as highly active oxygen evolution reaction electrocatalyst in acid electrolyte. *Nano Lett.* **21**, 2809-2816 (2021).
27. Zhang, J.-H. et al. Core-shell nanostructured Ru@Ir-O electrocatalysts for superb oxygen evolution in acid. *Small* **18**, 2108031 (2022).
28. Niu, S.-Q. et al. Low Ru loading RuO<sub>2</sub>/(Co,Mn)<sub>3</sub>O<sub>4</sub> nanocomposite with modulated electronic structure for efficient oxygen evolution reaction in acid. *Appl. Catal. B* **297**, 120442 (2021).
29. Zheng, Y.-R. et al. Monitoring oxygen production on mass-selected iridium-tantalum oxide electrocatalysts. *Nat. Energy* **7**, 55-64 (2022).
30. Su, H. et al. In-situ spectroscopic observation of dynamic-coupling oxygen on atomically dispersed iridium electrocatalyst for acidic water oxidation. *Nat. Commun.*, **12**, 6118 (2021).
31. Huang, H.-W. et al. Structure engineering defective and mass transfer-enhanced RuO<sub>2</sub> nanosheets for proton exchange membrane water electrolyzer. *Nano Energy* **88**, 106276 (2021).
32. Harzandi, A. M. et al. Ruthenium core-shell engineering with nickel single atoms for selective oxygen evolution via nondestructive mechanism. *Adv. Energy Mater.* **11**, 2003448 (2021).
33. Li, M.-G. et al. Exclusive strain effect boosts overall water splitting in PdCu/Ir core/shell nanocrystals. *Angew. Chem., Int. Ed.* **60**, 8243-8250 (2021).
34. Shi, Z.-P. et al. Customized reaction route for ruthenium oxide towards stabilized water oxidation in high-performance PEM electrolyzers, *Nat. Commun.* **14**, 843 (2023).
35. Wang, Y. et al. Unraveling oxygen vacancy site mechanism of Rh-doped RuO<sub>2</sub> catalyst for long-lasting acidic water oxidation, *Nat. Commun.* **14**, 1412 (2023).
36. Zhang, X.-X. et al. Fast modulation of *d*-Band Holes Quantity in the Early Reaction Stages for Boosting Acidic Oxygen Evolution, *Angew. Chem., Int. Ed.* **135**, 202308082 (2023).
37. Wen, Y.-Z. et al. Introducing Brønsted acid sites to accelerate the bridging-oxygen-assisted deprotonation in acidic water oxidation, *Nat. Commun.* **13**, 4871 (2022).
38. Zhang, X.-X. et al. Quick evolution of edge-shared metal-oxygen octahedrons for boosting acidic water oxidation. *Nano Energy* **102**, 107680 (2022).
39. Lin, C. et al. In-situ reconstructed Ru atom array on  $\alpha$ -MnO<sub>2</sub> with enhanced performance for acidic water oxidation. *Nat. Catal.* **4**, 1012-1023 (2021).

40. He J., Zhou X., Xu, P. & Sun, J.-M. Regulating electron redistribution of intermetallic iridium oxide by incorporating Ru for efficient acidic water oxidation. *Adv. Energy Mater.* **11**, 2102883 (2021).
41. Liu, H. et al. Eliminating over-oxidation of ruthenium oxides by niobium for highly stable electrocatalytic oxygen evolution in acidic media. *Joule* **7**, 558-573 (2023).
42. Galyamin, D. et al. Active and durable  $R_2MnRuO_7$  pyrochlores with low Ru content for acidic oxygen evolution. *Nat. Commun.* **14**, 2010 (2023).
43. Li, L. et al. Optimizing the electronics structure of ruthenium oxide by neodymium doping for enhanced acidic oxygen evolution catalysis. *Adv. Funct. Mater.* **33**, 2213304 (2023).
44. Lee, C.-S. et al. Catalyst-support interactions in  $Zr_2ON_2$ -supported  $IrO_x$  electrocatalysts to break the trade-Off relationship between the activity and stability in the acidic oxygen evolution reaction, *Adv. Funct. Mater.* **33**, 2301557 (2023).
45. Wang, X.-J. et al. Electronic structure modulation of  $RuO_2$  by  $TiO_2$  enriched with oxygen vacancies to boost acidic  $O_2$  evolution, *ACS Catal.* **12**, 9437-9445 (2022).
46. Huang, B. et al. Tensile-strained  $RuO_2$  loaded on antimony-tin oxide by fast quenching for proton-exchange membrane water electrolyzer, *Adv. Sci.* **9**, 2201654 (2022).
47. Hao, S.-Y. et al. Dopants fixation of ruthenium for boosting acidic oxygen evolution stability and activity, *Nat. Commun.* **11**, 5368 (2020).
