# Supplementary material for: Stabilizing non-iridium active sites by non-stoichiometric oxide for acidic water oxidation at high current density
Source: PubMed Central journal article supplement (PMC10667250; doi:10.1038/s41467-023-43466-x), 2023-11-23
Supplement: 41467_2023_43466_MOESM3_ESM.pdf [file 41467_2023_43466_MOESM3_ESM.pdf]

## Description of Additional Supplementary Files

**Supplementary Movie 1** : A movie showing the process of the binder-free Ru/TiO<sub>x</sub> electrode working directly as an anode for water electrolysis in 0.5 M H<sub>2</sub>SO<sub>4</sub> at different current densities.

**Supplementary Movie 2** : A movie showing that the Ru/TiO<sub>x</sub> electrode working directly as an anode for untreated seawater electrolysis at 100 mA cm<sup>-2</sup>.
